# Supplementary material for: Encapsulation mechanisms and structural studies of GRM2 bacterial microcompartment particles
Source: PubMed Central journal article supplement (PMC6971018; doi:10.1038/s41467-019-14205-y), 2020-01-20
Supplement: 41467_2019_14205_MOESM1_ESM.pdf [file 41467_2019_14205_MOESM1_ESM.pdf]

# Encapsulation mechanisms and structural studies of GRM2 bacterial microcompartment particles

Kalnins et. al.

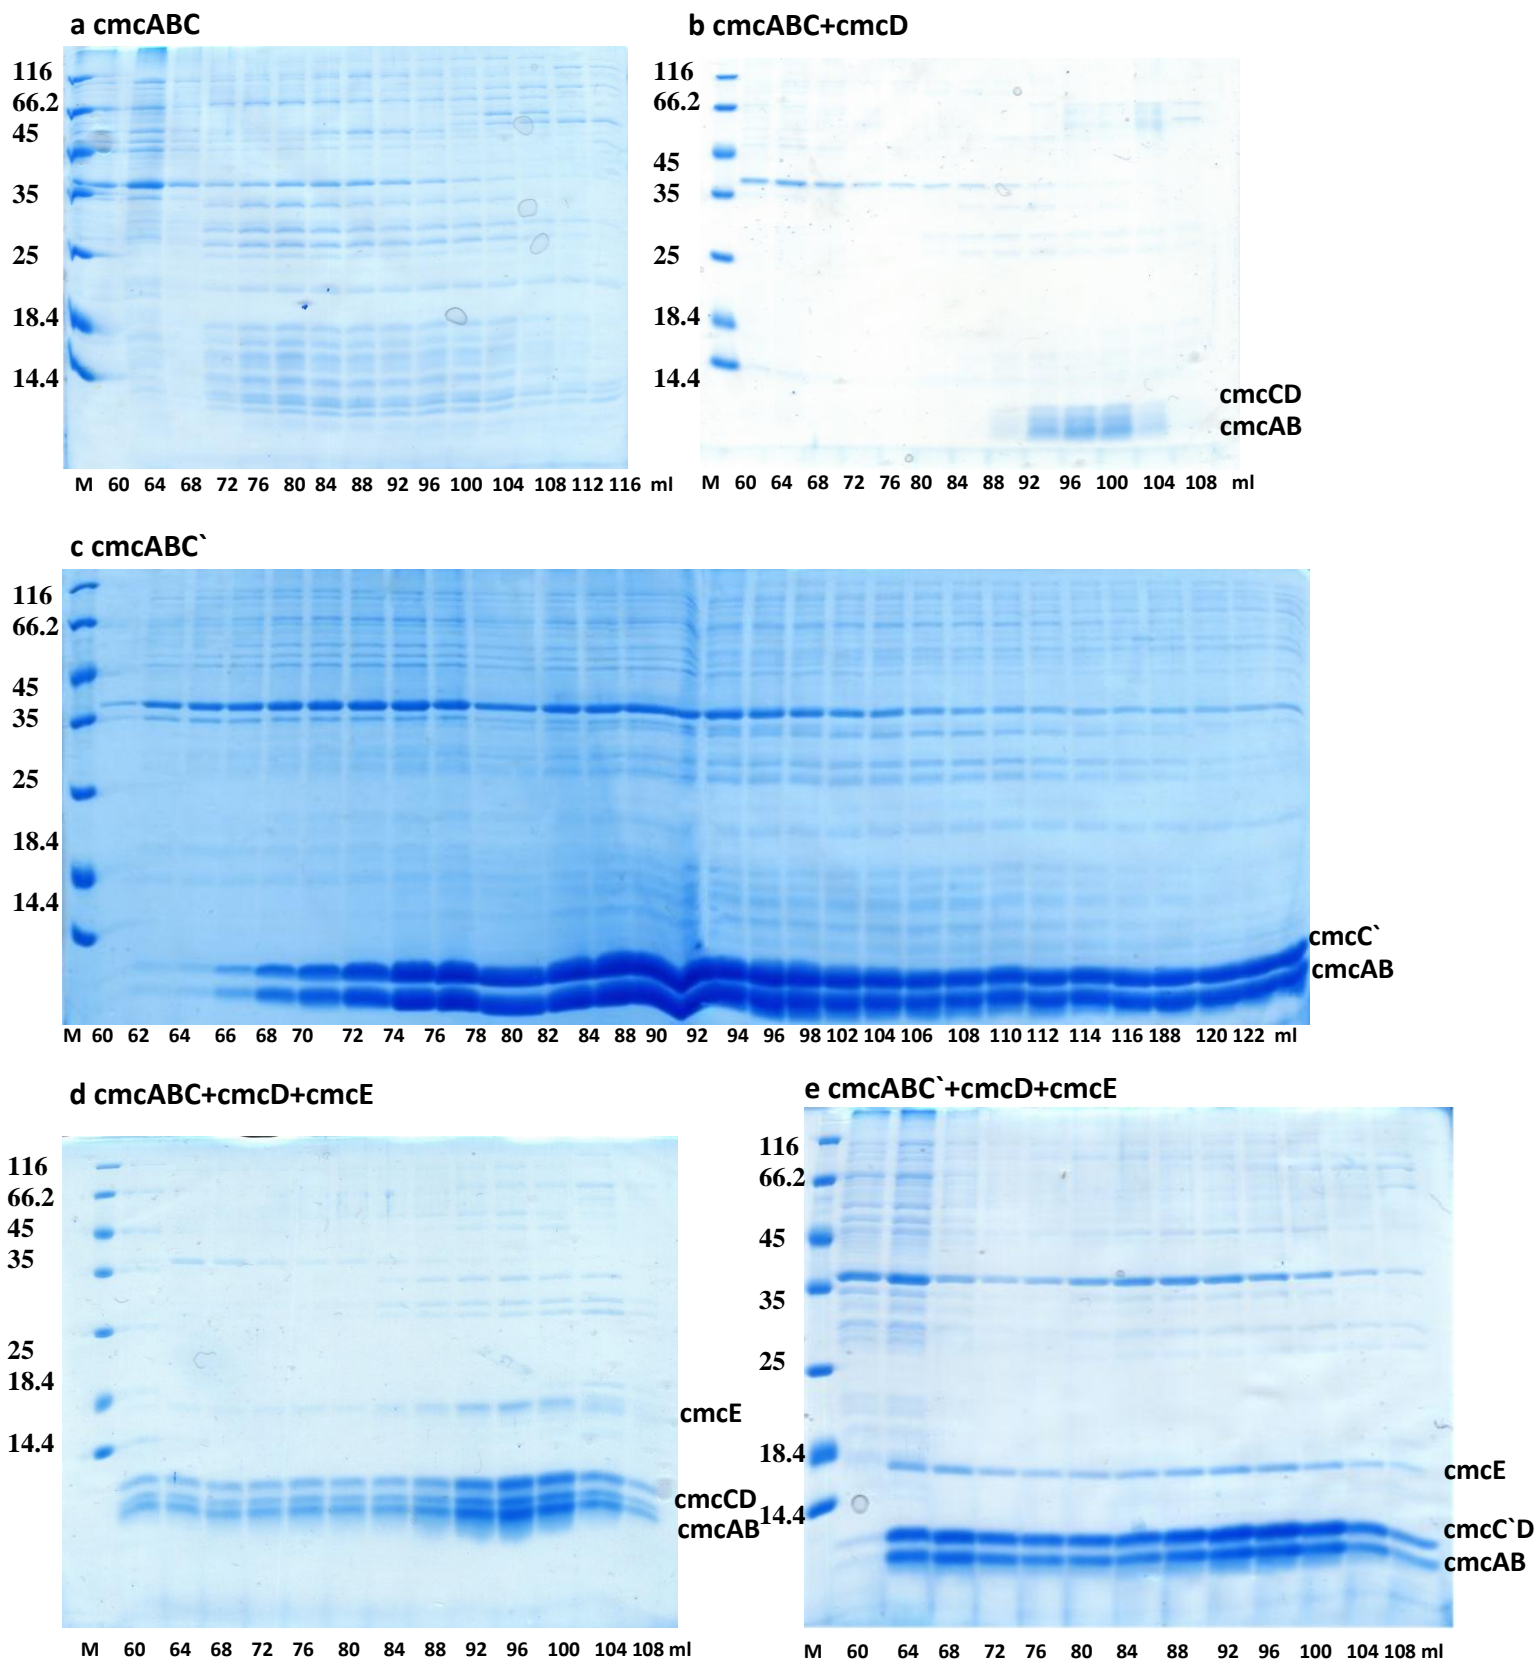

**Supplementary Figure 1 SDS-PAGE analysis of Superose 6 gel filtration chromatography processes. a,** cmcABC 60-112 ml. **b,** cmcABC+cmcD 60-116 ml. **c,** cmcABC' 60-122 ml, corresponding protein bands are identified. **d,** cmcABC+cmcD+cmcE 60-108 ml. **e,** cmcABC'+cmcD+cmcE 60-108 ml, corresponding protein bands are identified. M – marker, sizes are measured in kDa.

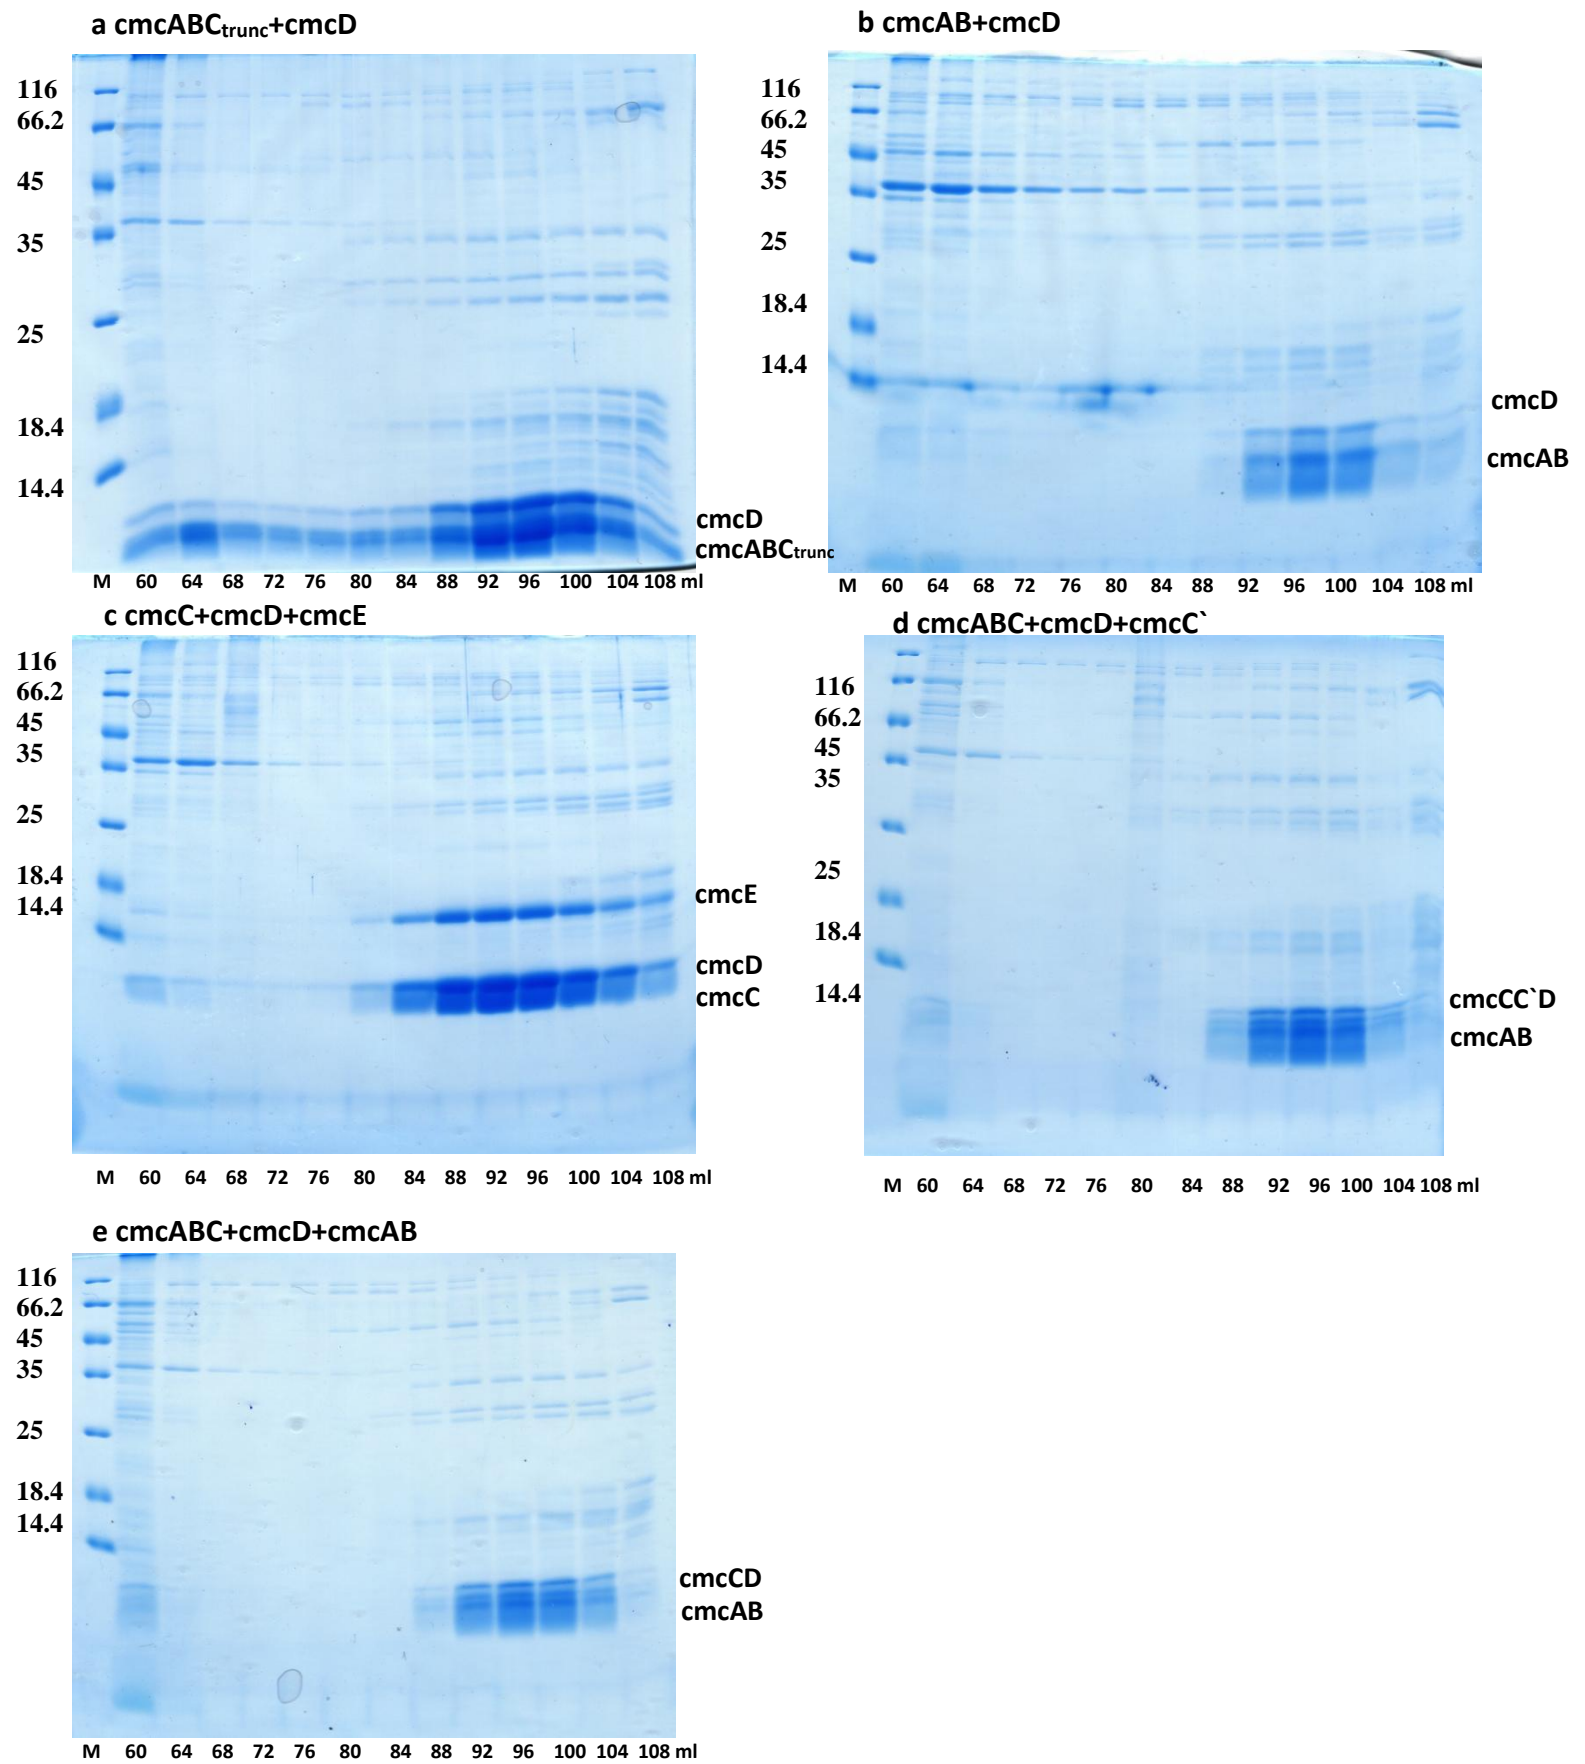

**Supplementary Figure 2 SDS-PAGE analysis of Superose 6 gel filtration chromatography processes. a,**  $cmcABC_{trunc}+D$  60-108 ml. **b,**  $cmcAB+cmcD$  60-108 ml. **c,**  $cmcC+cmcD+cmcE$  60-108 ml. **d,**  $cmcABC+cmcD+cmcC'$  60-108 ml. **e,**  $cmcABC+cmcD+cmcAB$  60-108 ml. M – marker, sizes are measured in kDa.

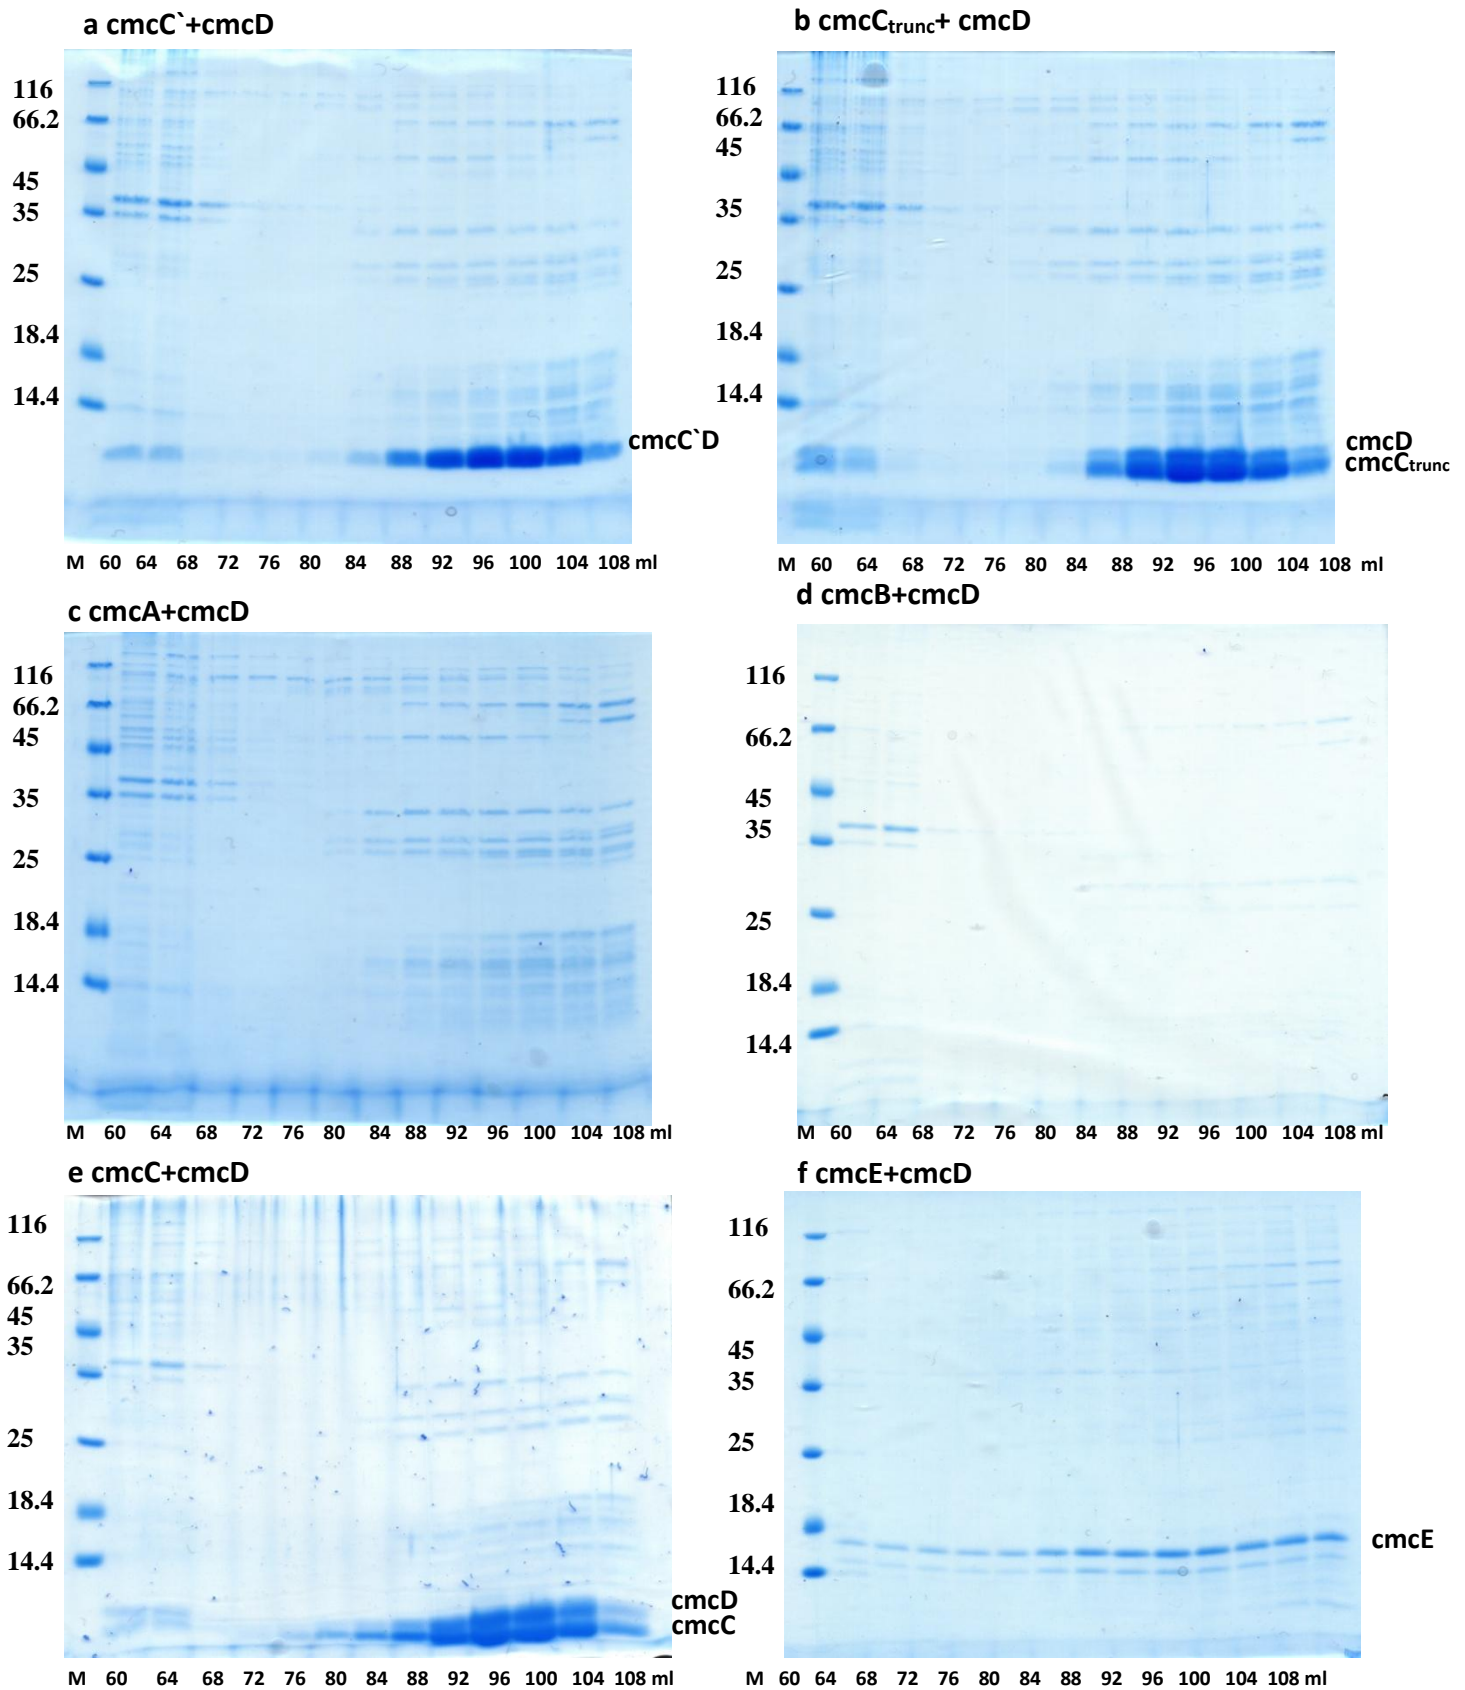

**Supplementary Figure 3 SDS-PAGE analysis of Superose 6 gel filtration chromatography processes. a,**  $cmcC^{\backslash}+cmcD$  60-108 ml. **b,**  $cmcC_{trunc}+ cmcD$  60-108 ml. **c,**  $cmcA+ cmcD$  60-108 ml. **d,**  $cmcB+ cmcD$  60-108 ml. **e,**  $cmcC+ cmcD$  60-108 ml. **f,**  $cmcE+ cmcD$  60-108 ml. M – marker, sizes are measured in kDa.



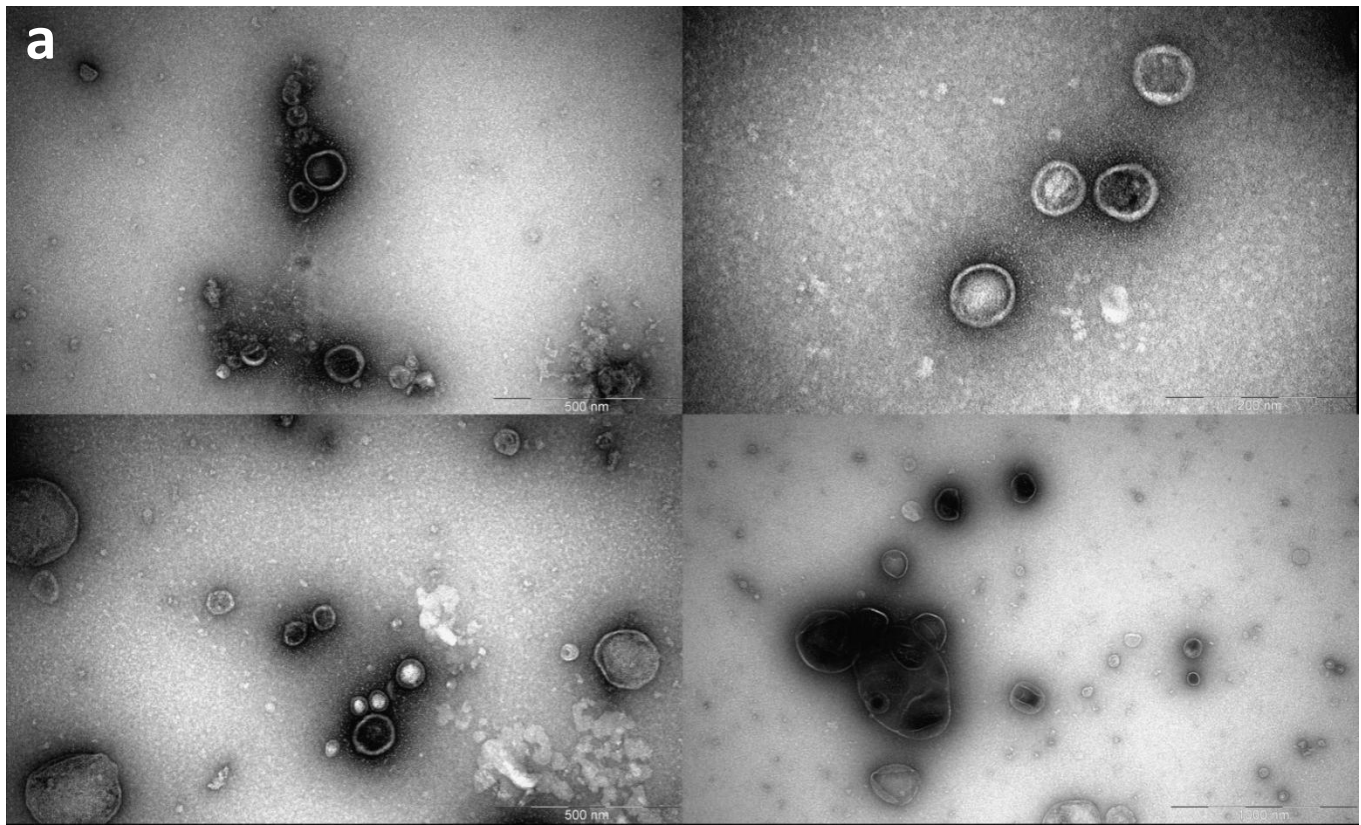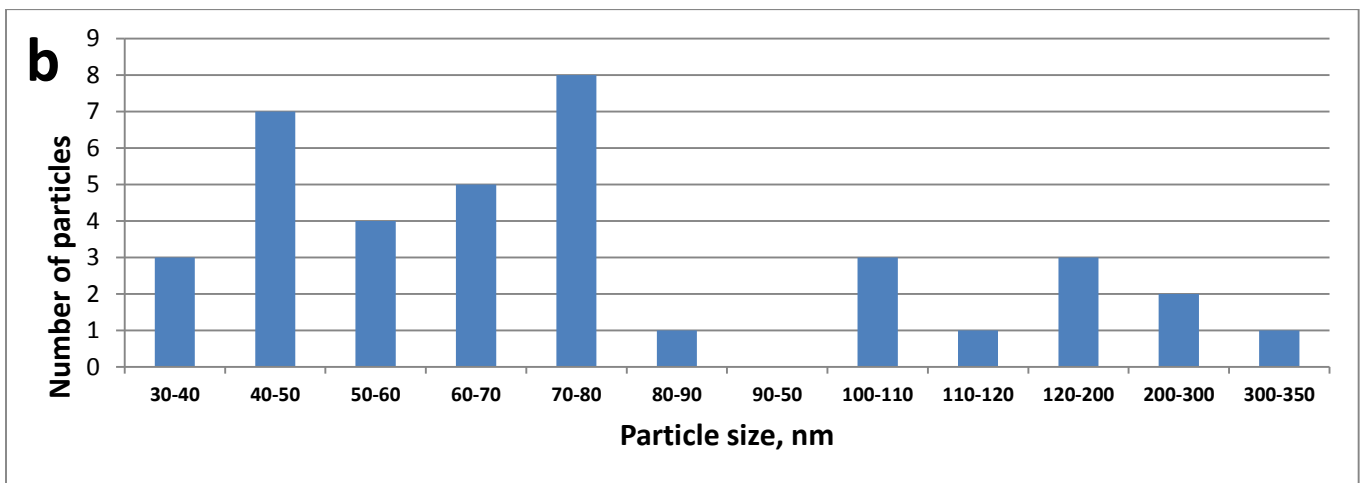

**Supplementary Figure 4 TEM analysis of Superose 6 gel filtration 60-62 ml fraction of cmcABC<sup>+</sup>D BDPs. a, negative staining TEM micrographs. b, particle size distribution, determined with ImageJ software.**

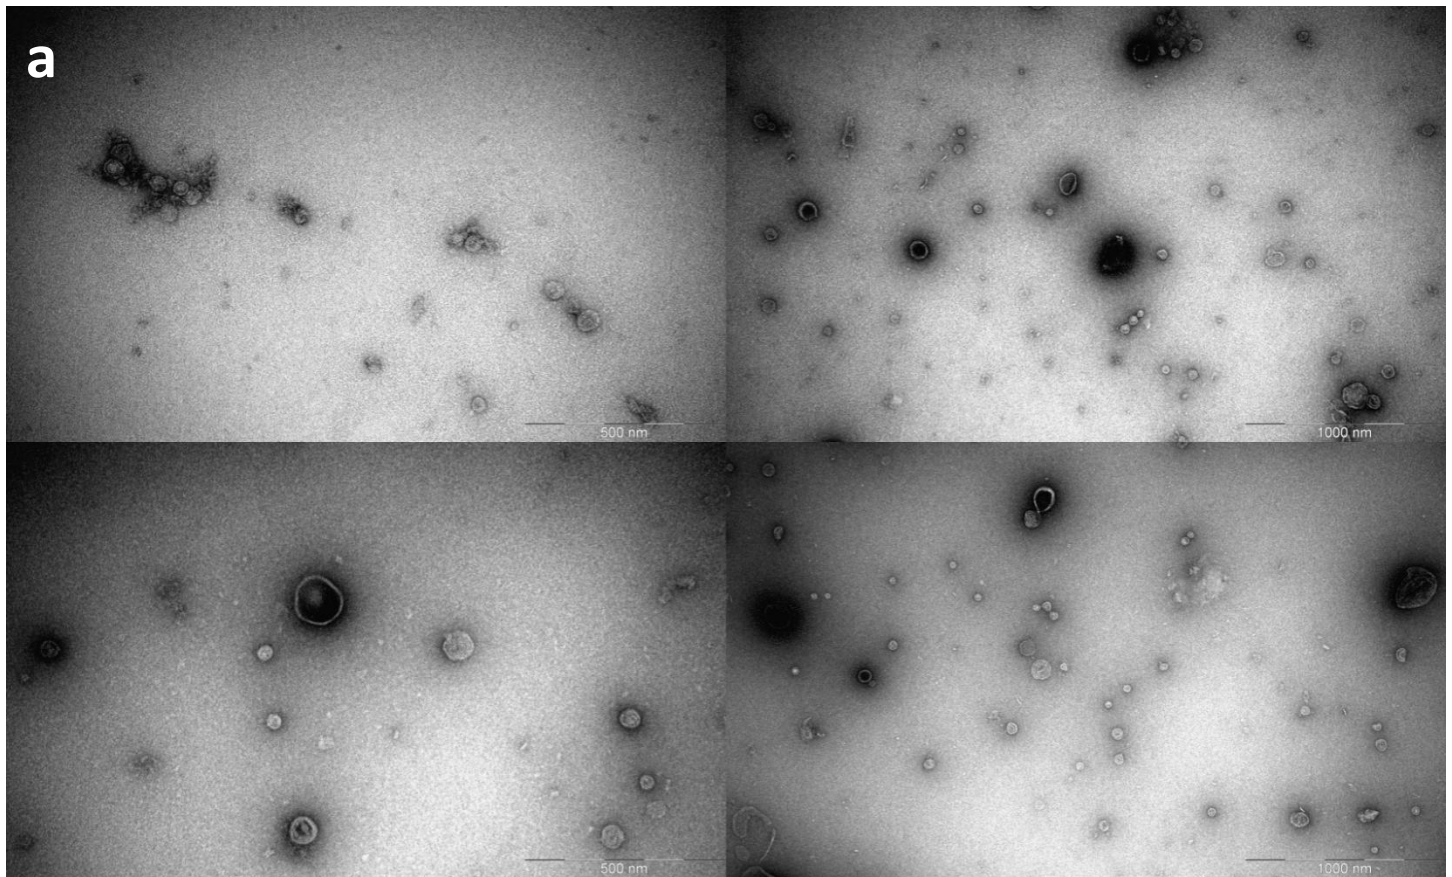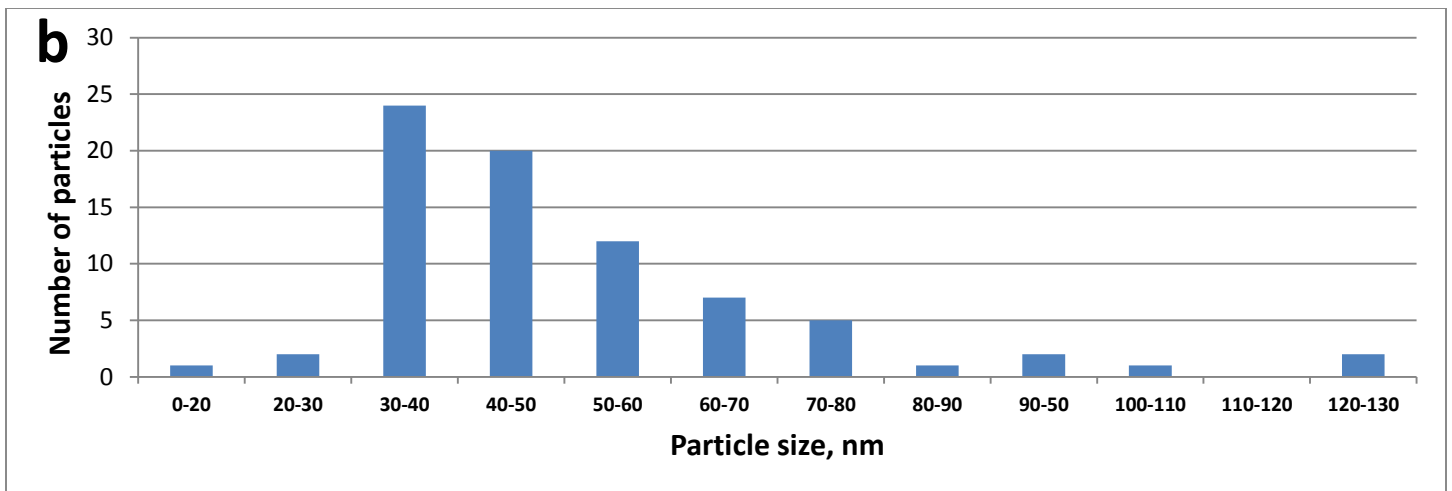

**Supplementary Figure 5** TEM analysis of Superose 6 76-78 ml fraction of cmcABC<sup>+</sup>D BDPs. **a**, negative staining TEM micrographs. **b**, particle size distribution, determined with ImageJ software.



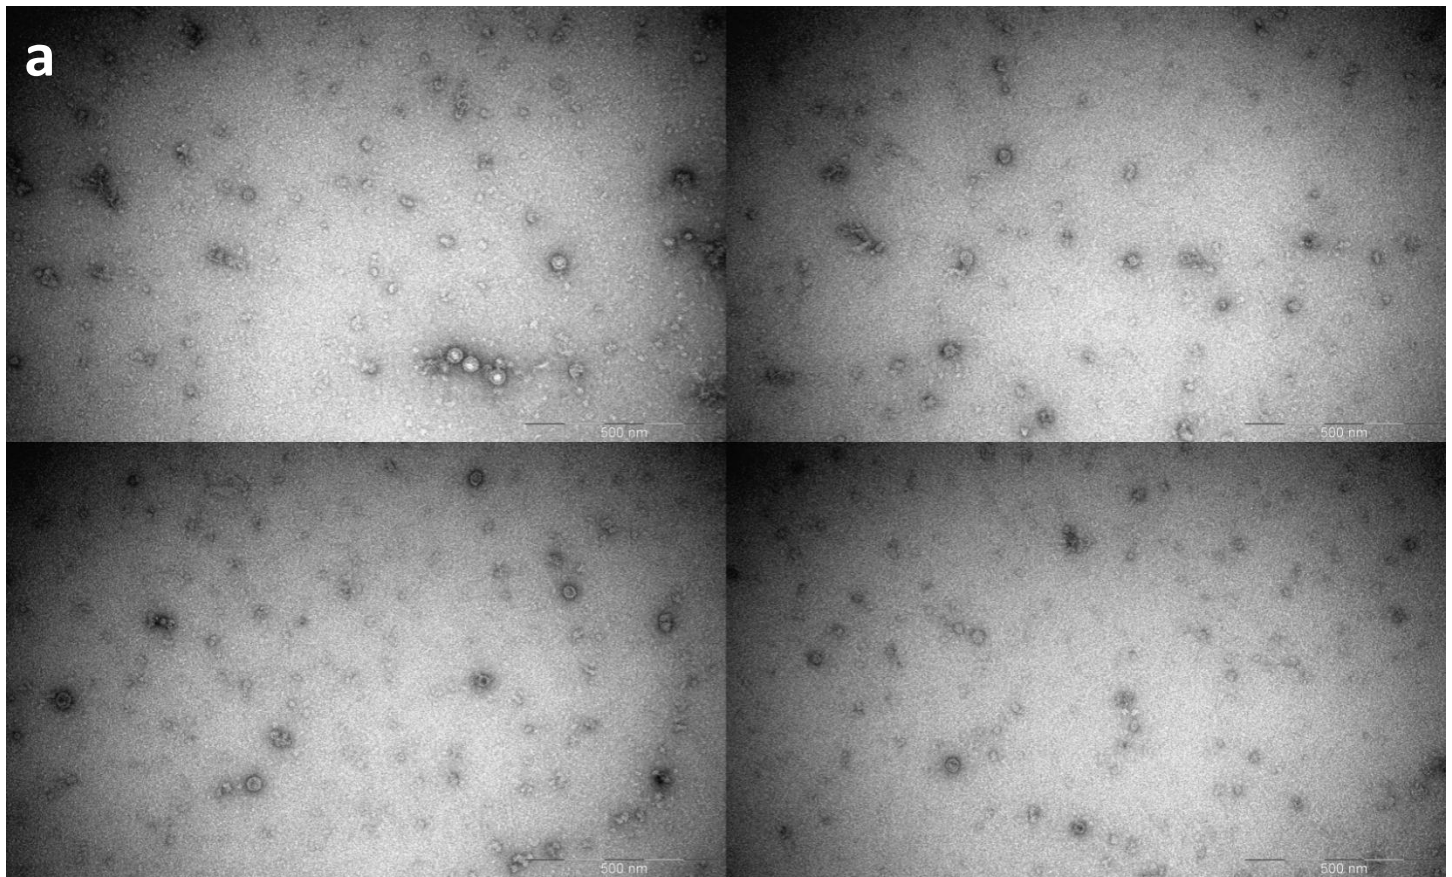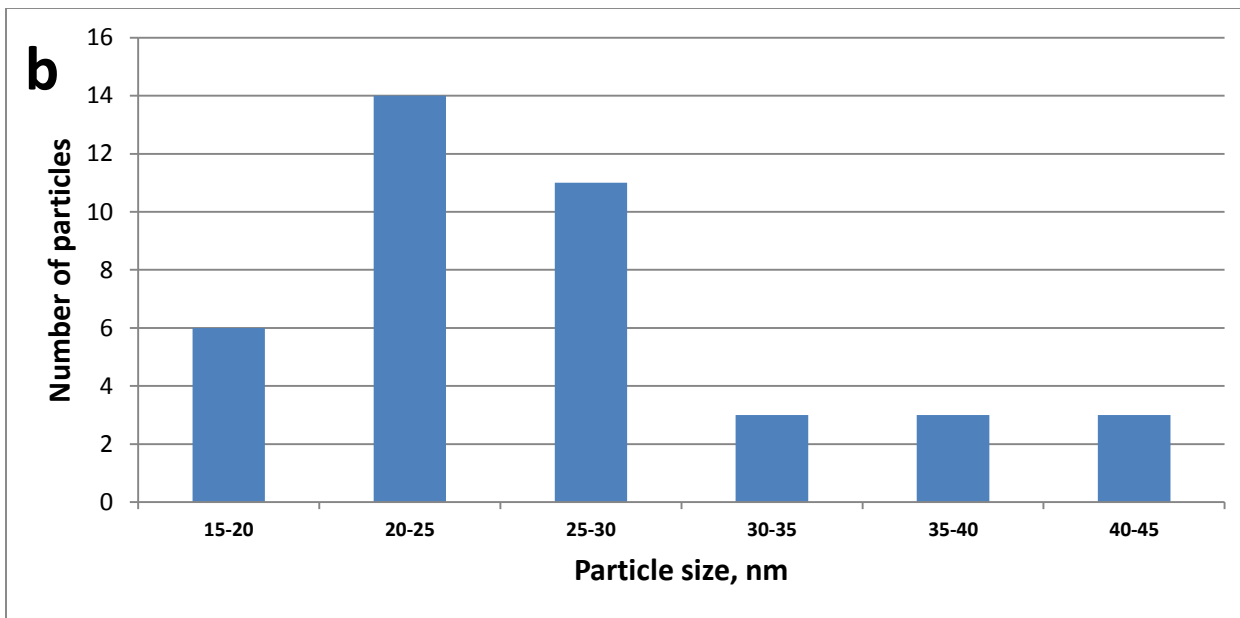

**Supplementary Figure 6 TEM analysis of Superose 6 84-86 ml fraction of cmcABC`+D BDPs. a,** negative staining TEM micrographs. **b,** particle size distribution, determined with ImageJ software.

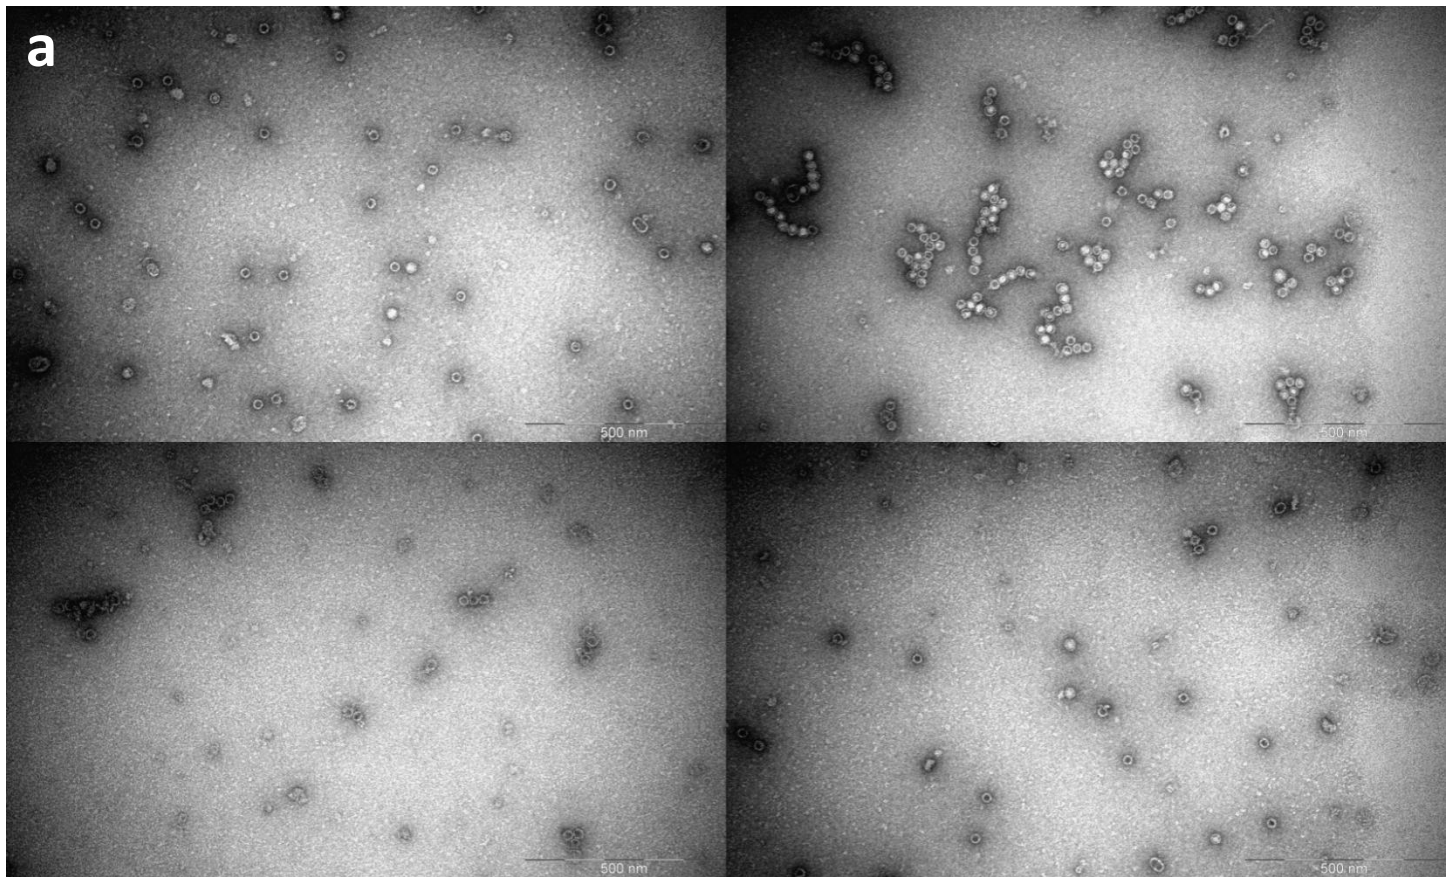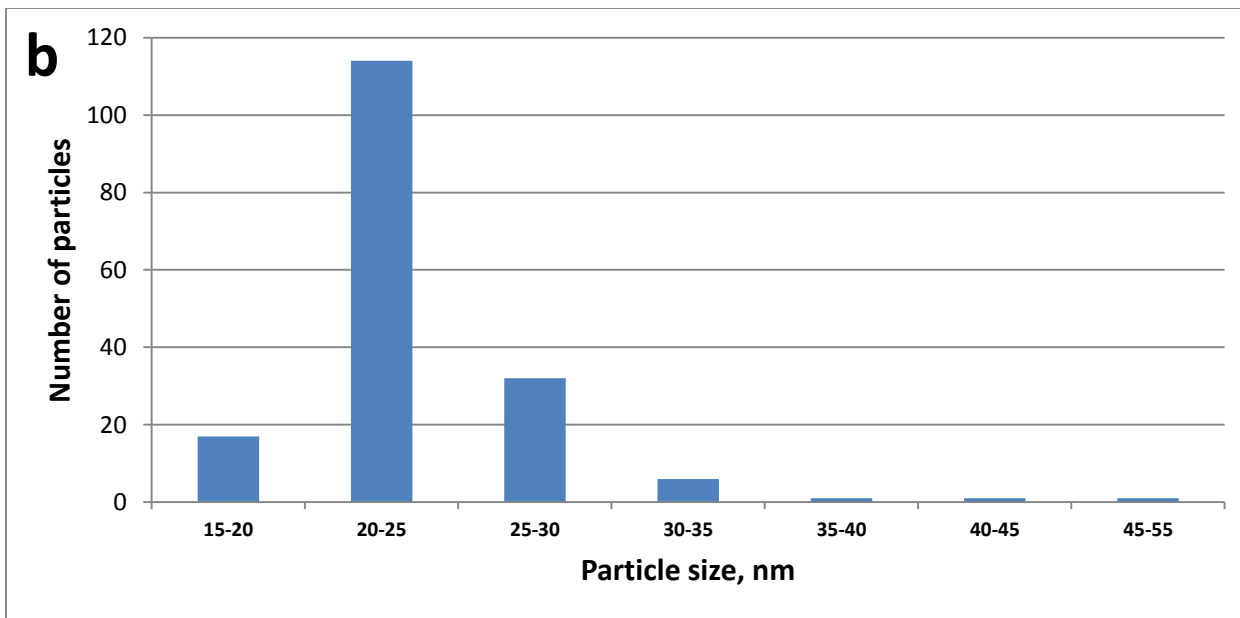

**Supplementary Figure 7** TEM analysis of Superose 96-98 ml fraction of cmcABC`+D BDPs. **a**, negative staining TEM micrographs. **b**, particle size distribution, determined with ImageJ software.





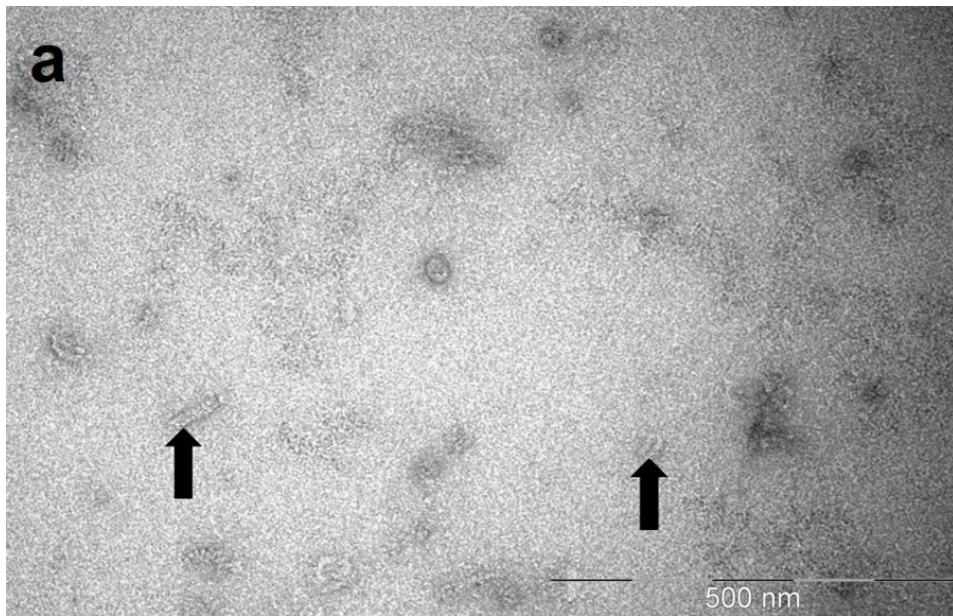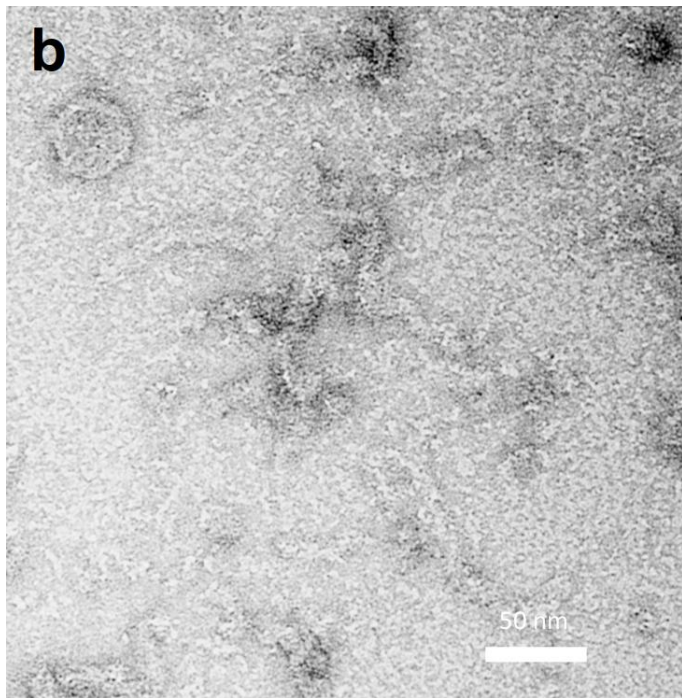

**Supplementary Figure 9 TEM analysis of a, cmcABC<sup>+</sup> and b, cmcE+D BDPs.** Both tubular and round particles can be observed. Fractions containing 80-84 ml from cmcABC<sup>+</sup> and cmcE+D 94-96 ml Superose 6 gel filtration were analyzed.

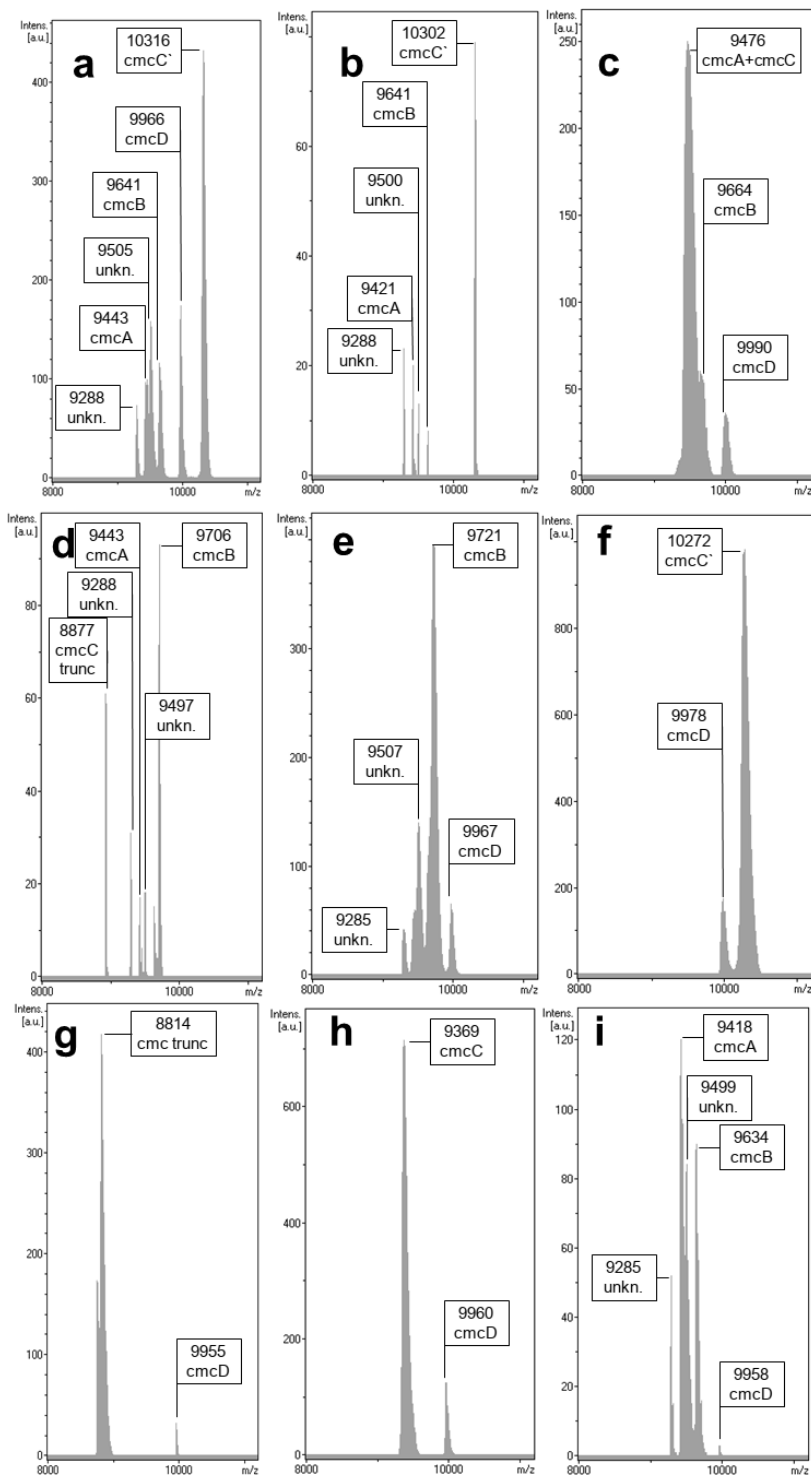

### Expected m/z values

|                       |       |
|-----------------------|-------|
| cmcA                  | 9415  |
| cmcB                  | 9624  |
| cmcC                  | 9414  |
| cmcC'                 | 10293 |
| cmcC <sub>trunc</sub> | 8879  |
| cmcD                  | 9949  |

**Supplementary Figure 10 MALDI-TOF analyses of BDPs.** **a**, cmcABC' + cmcD small particle zone (94-96 ml fraction of Superose 6 gel filtration chromatography). **b**, cmcABC' + cmcD large particle zone (58-60 ml fraction of Superose 6 gel filtration chromatography). **c**, cmcABC + cmcD small particle zone (94-96 ml fraction of Superose 6 gel filtration chromatography). **d**, cmcABC<sub>trunc</sub> + cmcD large particle zone (58-60 ml fraction of Superose 6 gel filtration chromatography). **e**, cmcABC<sub>trunc</sub> + cmcD small particle zone (94-96 ml fraction of Superose 6 gel filtration chromatography). **f**, cmcC' + cmcD small particle zone (94-96 ml fraction of Superose 6 gel filtration chromatography). **g**, cmcC<sub>trunc</sub> + cmcD small particle zone (94-96 ml fraction of Superose 6 gel filtration chromatography). **h**, cmcC + cmcD large particle zone (58-60 ml fraction of Superose 6 gel filtration chromatography). **i**, cmcAB + cmcD small particle zone (94-96 ml fraction of Superose 6 gel filtration chromatography).



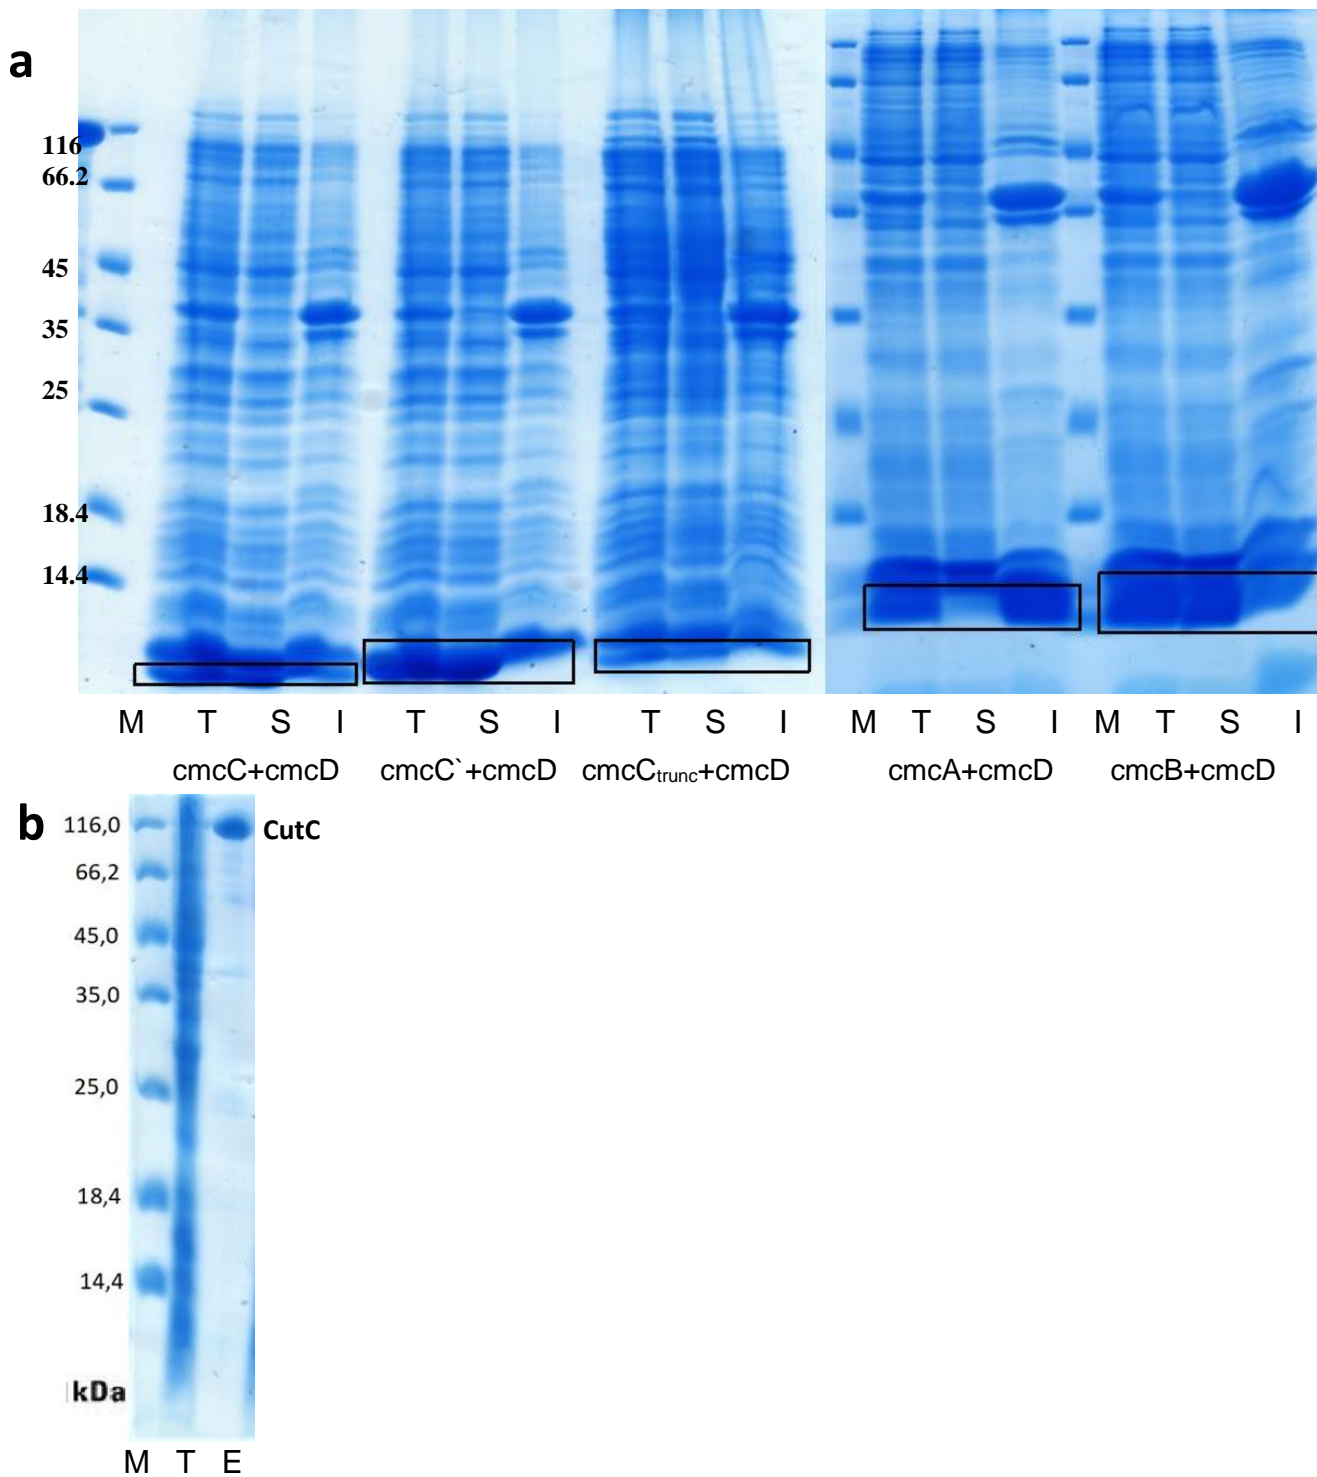

**Supplementary Figure 11 Expression level and solubility SDS-PAGE analysis of *cmcC+cmcD*, *cmcC'+cmcD*, *cmcC<sub>trunc</sub>+cmcD*, *cmcA+cmcD* and *cmcB+cmcD* constructs and SDS-PAGE analysis of pull-down assay of H6-CutC+CutO co-expression. **a**, *cmcC*, *cmcC'*, *cmcC<sub>trunc</sub>*, *cmcA* and *cmcB* zones are framed, *cmcC'* is very close to *cmcD* and both are framed. Total lysate (T), supernatant after centrifugation at 16000 g (S) and insoluble fraction in pellet (I). M – marker, sizes are measured in kDa. **b**, SDS-PAGE analysis of H6x-CutC+CutO co-expression His-trap Ni<sup>2+</sup> affinity chromatography elution fraction (E) and total lysate (T). Only CutC band is present in elution fraction, no CutO is observable. M – marker, sizes are measured in kDa.**

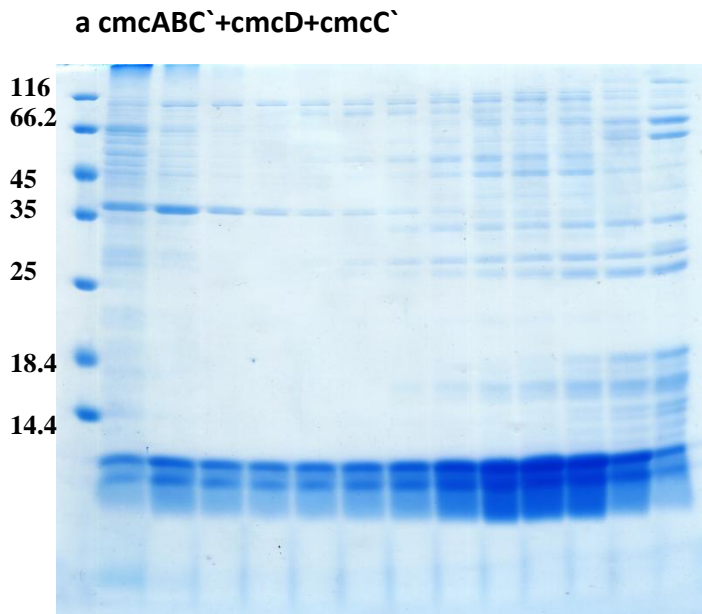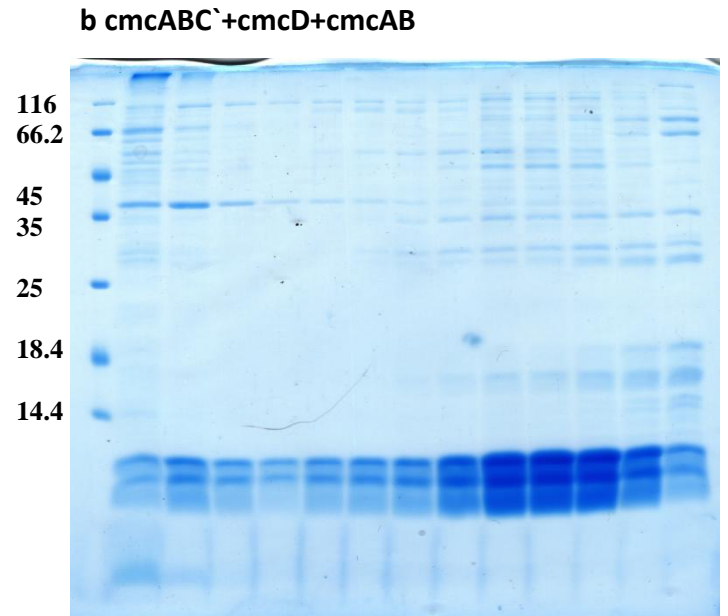

**Supplementary Figure 12 SDS-PAGE analysis of Superose 6 gel filtration chromatography processes. a,** cmcABC`+cmcD+cmcC` 60-108 ml. **b,** cmcABC`+cmcD+cmcAB 60-108 ml.

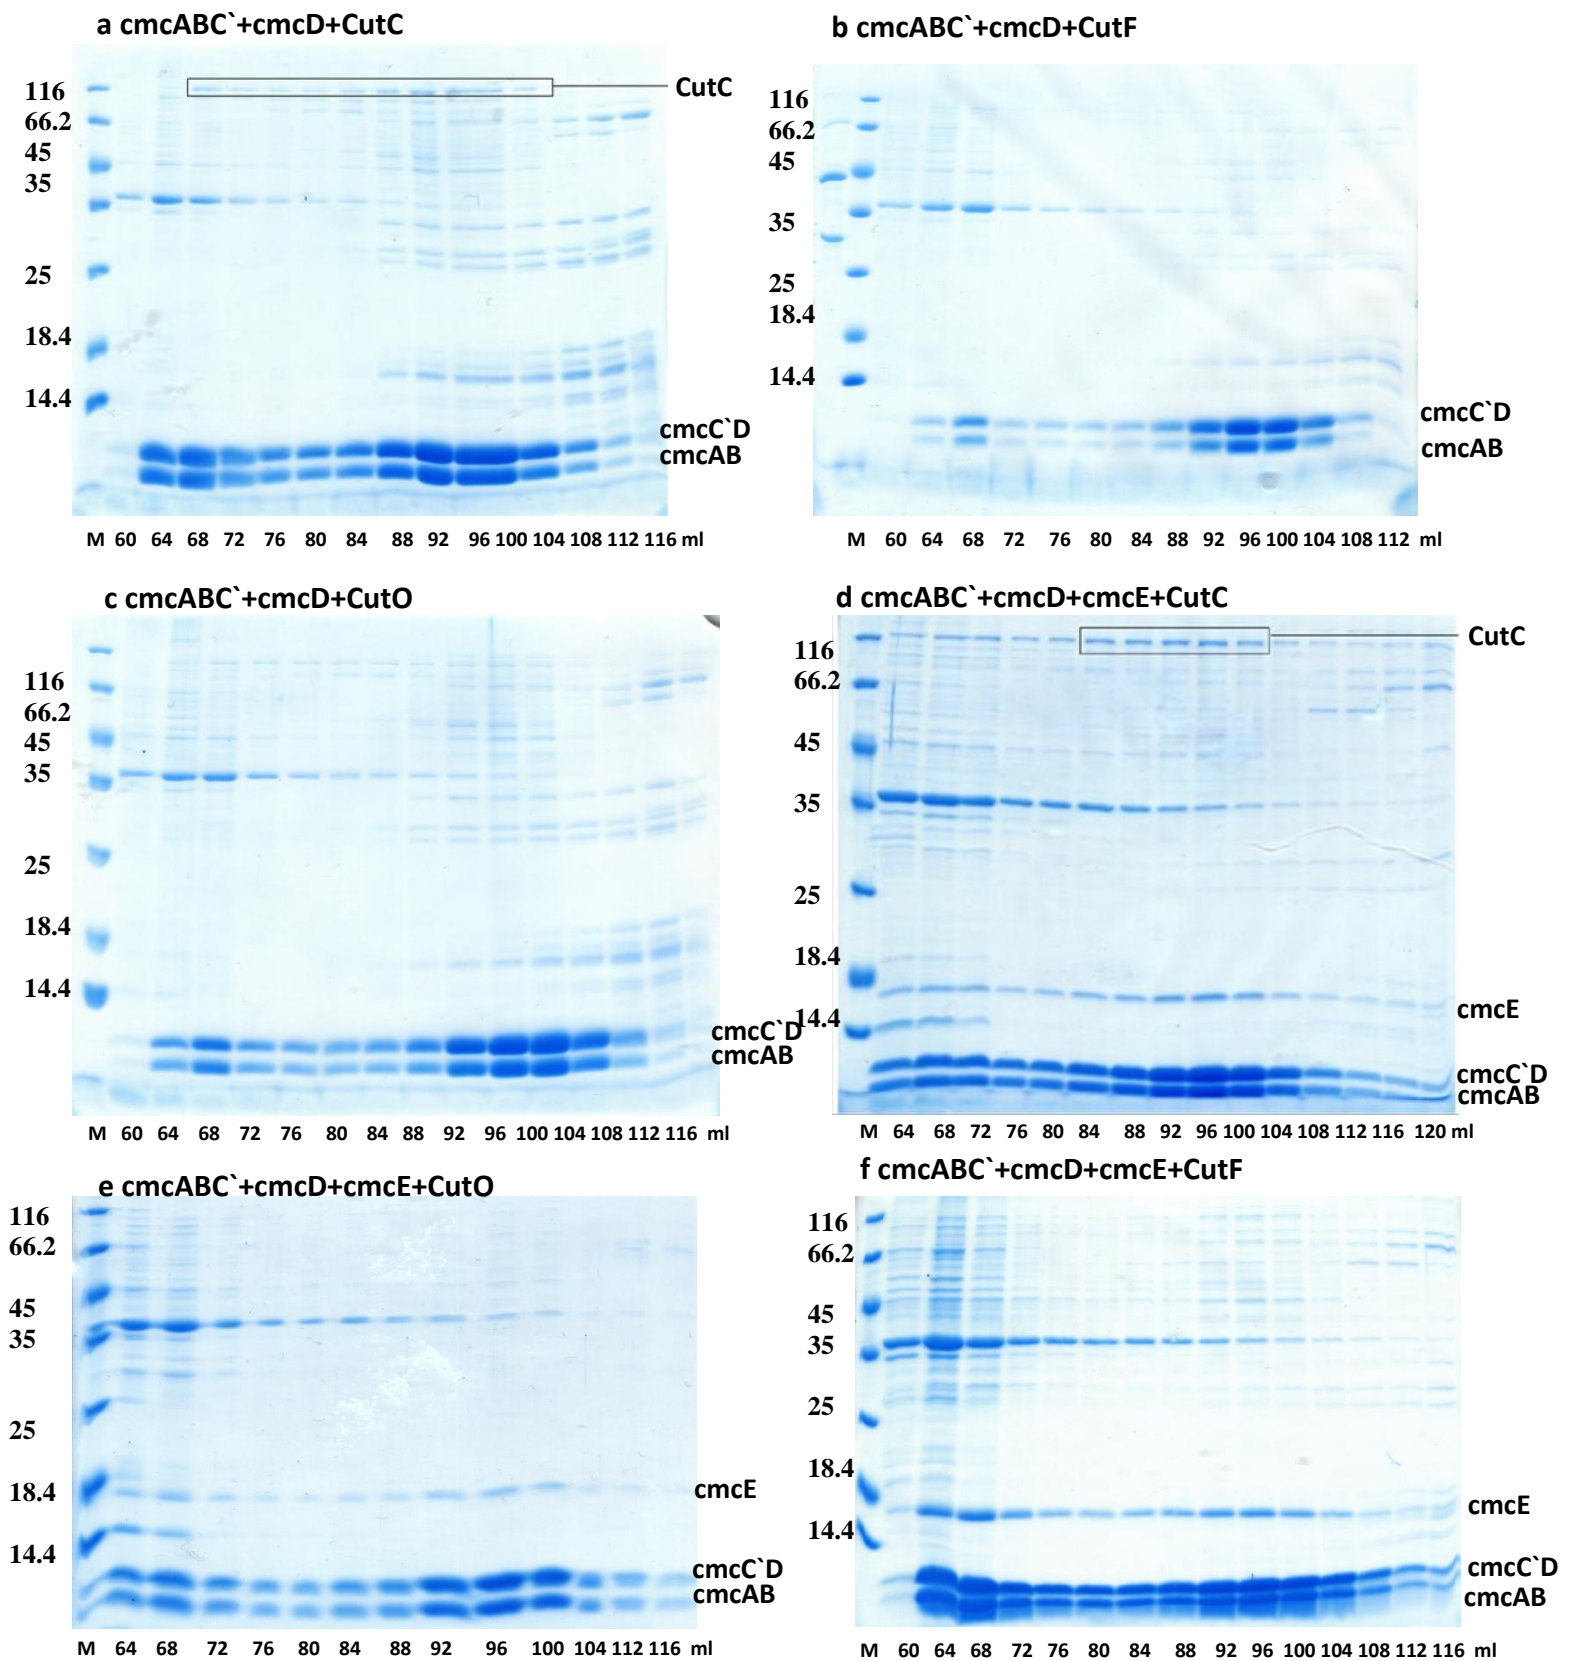

**Supplementary Figure 13 SDS-PAGE analysis of Superose 6 gel filtration chromatography processes, corresponding protein bands are identified. a,**  $cmcABC`+cmcD +CutC$  60-116 ml. **b,**  $cmcABC`+cmcD +CutF$  60-112 ml. **c,**  $cmcABC`+cmcD +CutO$  60-112 ml. **d,**  $cmcABC+cmcD+cmcE$  64-120 ml, **e,**  $cmcABC`+cmcD+cmcE+CutO$  64-116 ml. **f,**  $cmcABC`+cmcD+cmcE+CutF$  60-116 ml. M – marker, sizes are measured in kDa.



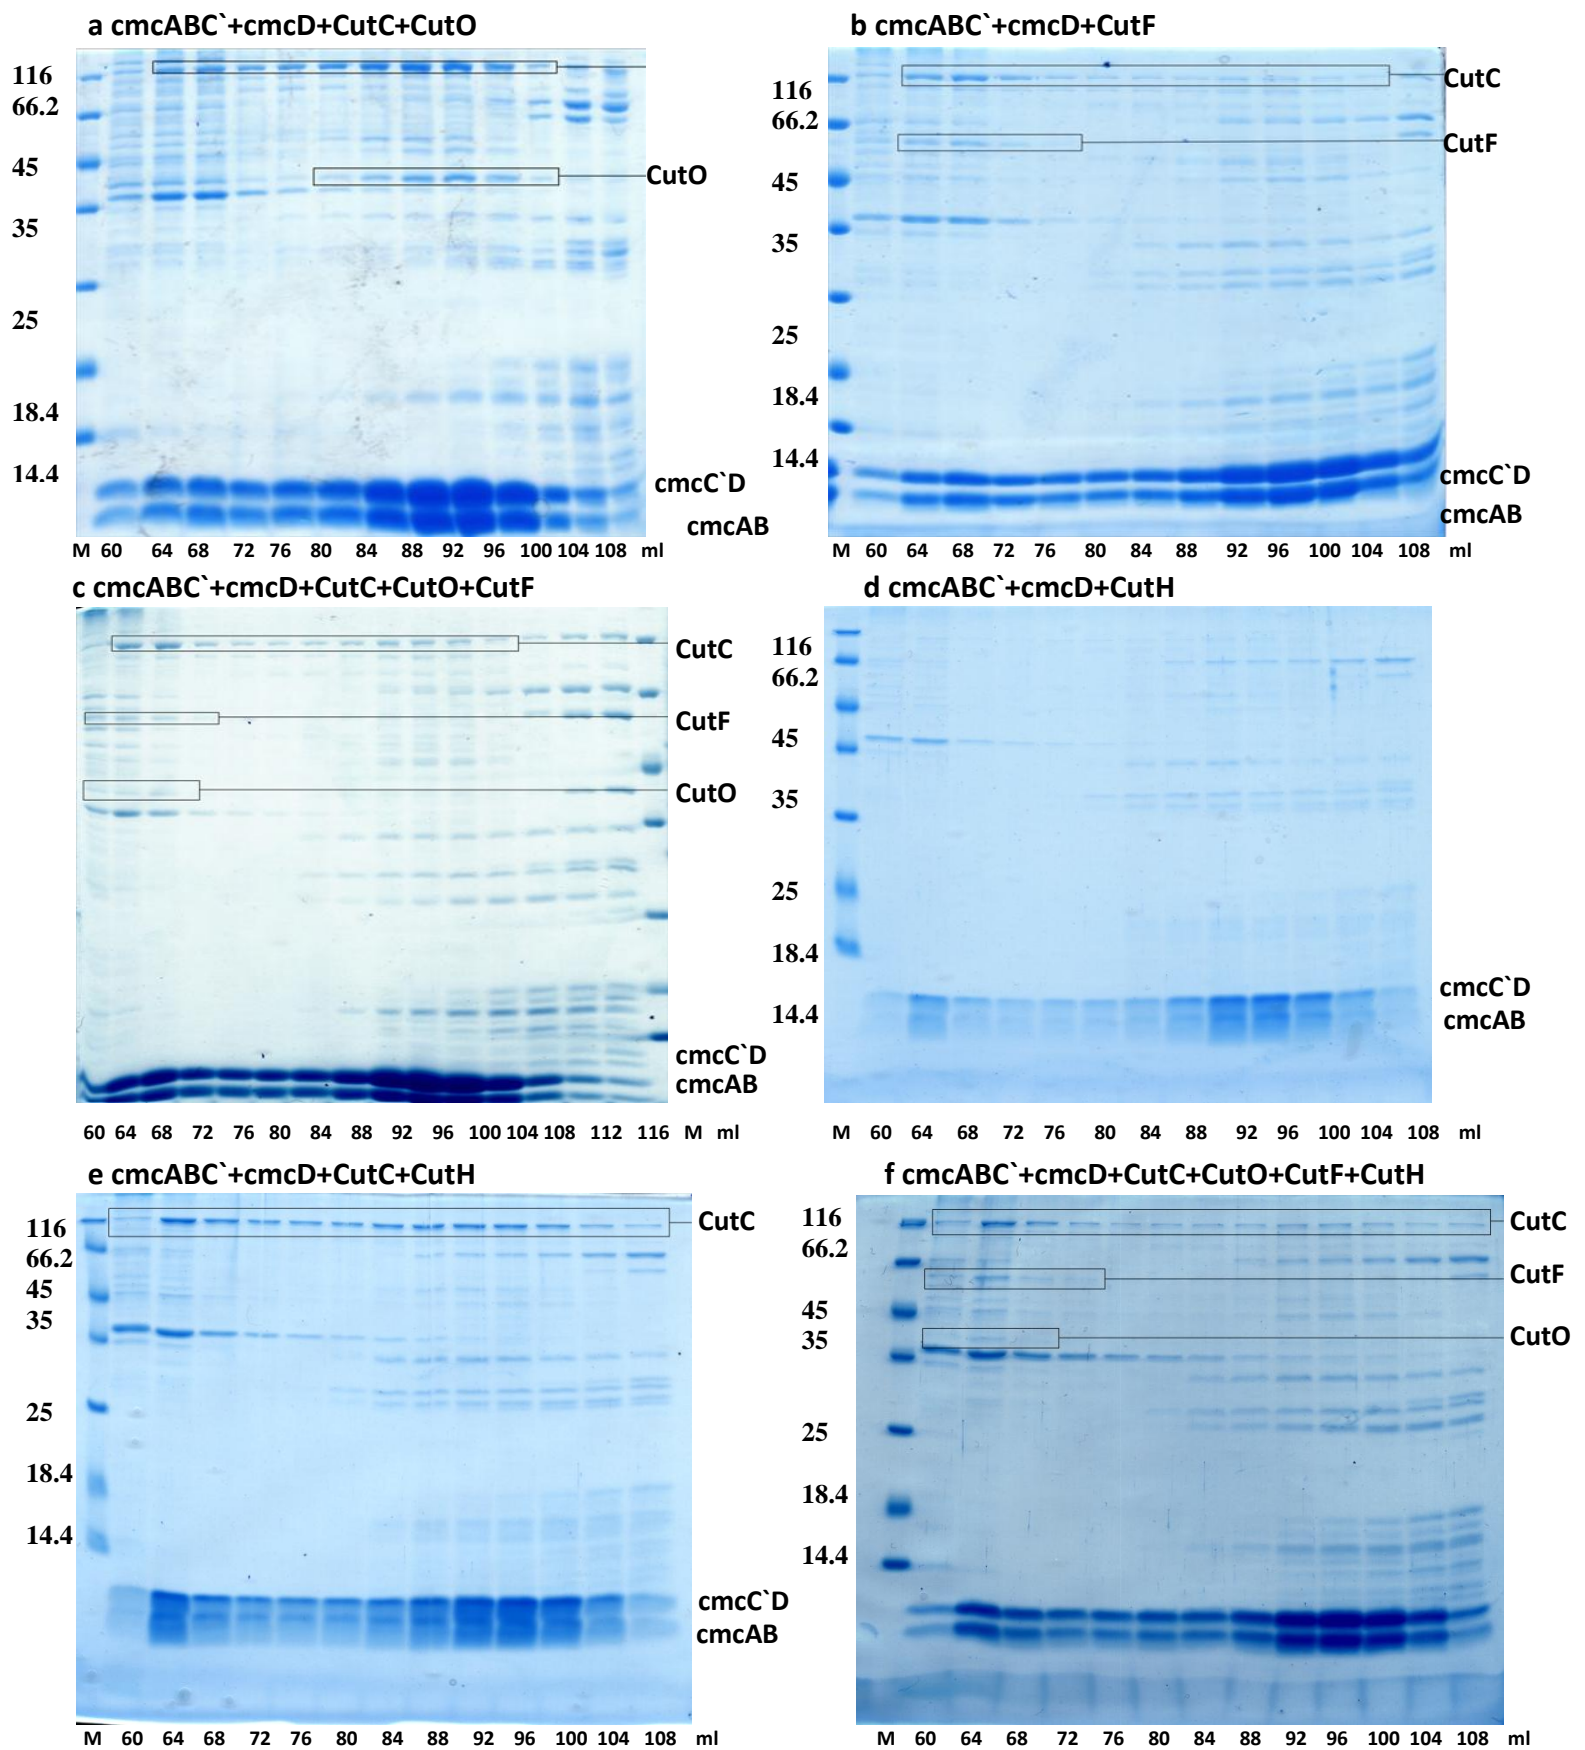

**Supplementary Figure 14 SDS-PAGE analysis of Superose 6 gel filtration chromatography processes, corresponding protein bands are identified. a,**  $cmcABC^- + cmcD + CutC + CutO$  60-108 ml. **b,**  $cmcABC^- + cmcD + CutC + CutF$  60-108 ml. **c,**  $cmcABC^- + cmcD + CutC + CutO + CutF$  60-116 ml. **d,**  $cmcABC^- + cmcD + CutH$  60-108 ml. **e,**  $cmcABC^- + cmcD + CutC + CutH$  60-108 ml. **f,**  $cmcABC^- + cmcD + CutC + CutO + CutF + CutH$  60-108 ml. M – marker, sizes are measured in kDa.

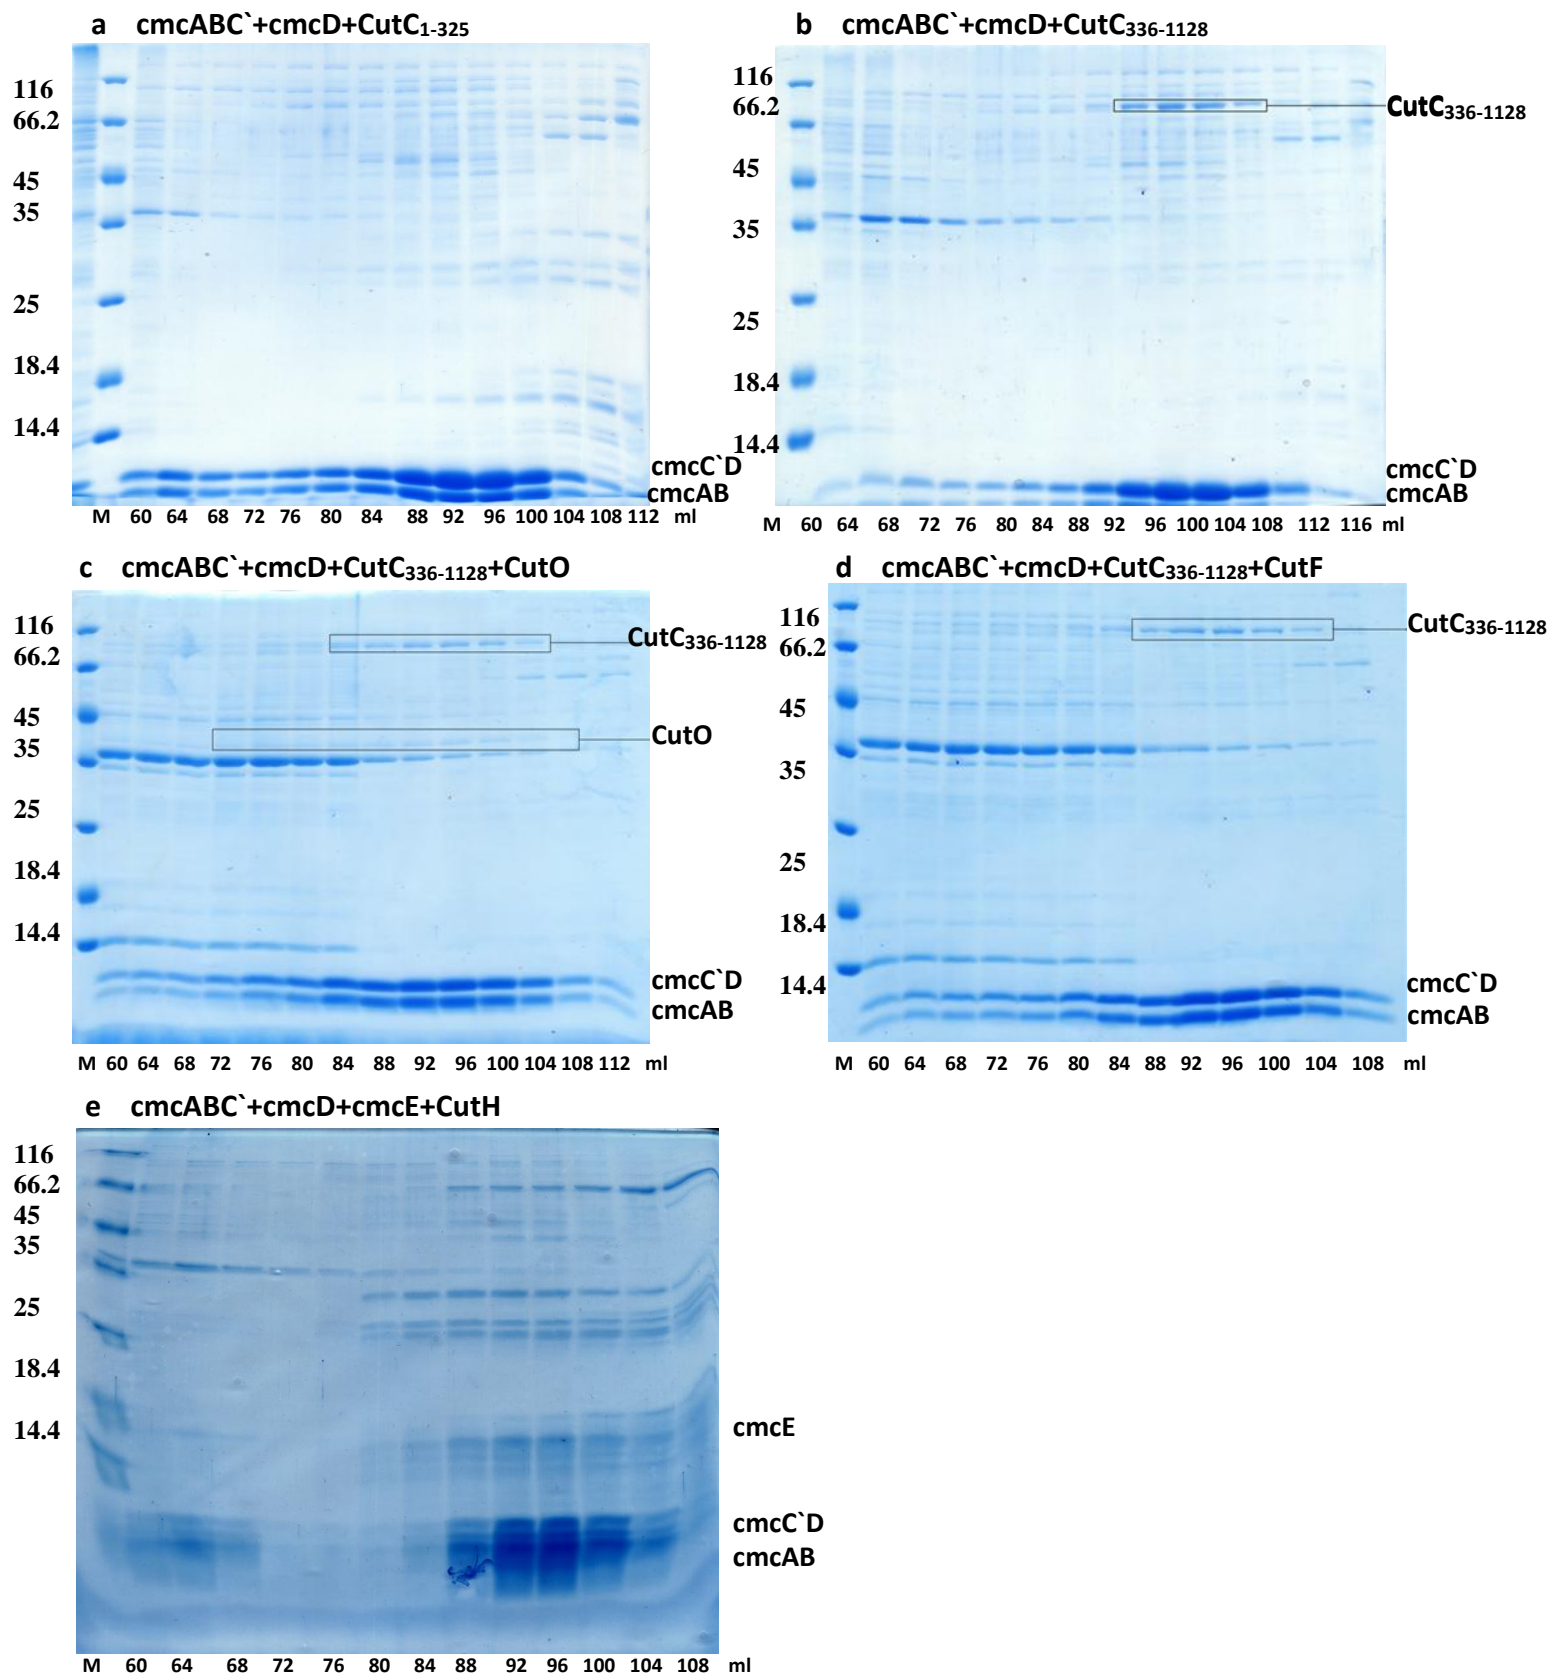

**Supplementary Figure 15 SDS-PAGE analysis of Superose 6 gel filtration chromatography processes, corresponding protein bands are identified. a,**  $cmcABC^{\sim}+cmcD+CutC_{1-325}$  60-112 ml. **b,**  $cmcABC^{\sim}+cmcD+CutC_{336-1128}$  60-116 ml. **c,**  $cmcABC^{\sim}+cmcD+CutC_{336-1128}+CutO$  60-122 ml. **d,**  $cmcABC^{\sim}+cmcD+CutC_{336-1128}+CutF$  60-108 ml. **e,**  $cmcABC^{\sim}+cmcD+cmcE+CutH$  60-108 ml. M – marker, sizes are measured in kDa.

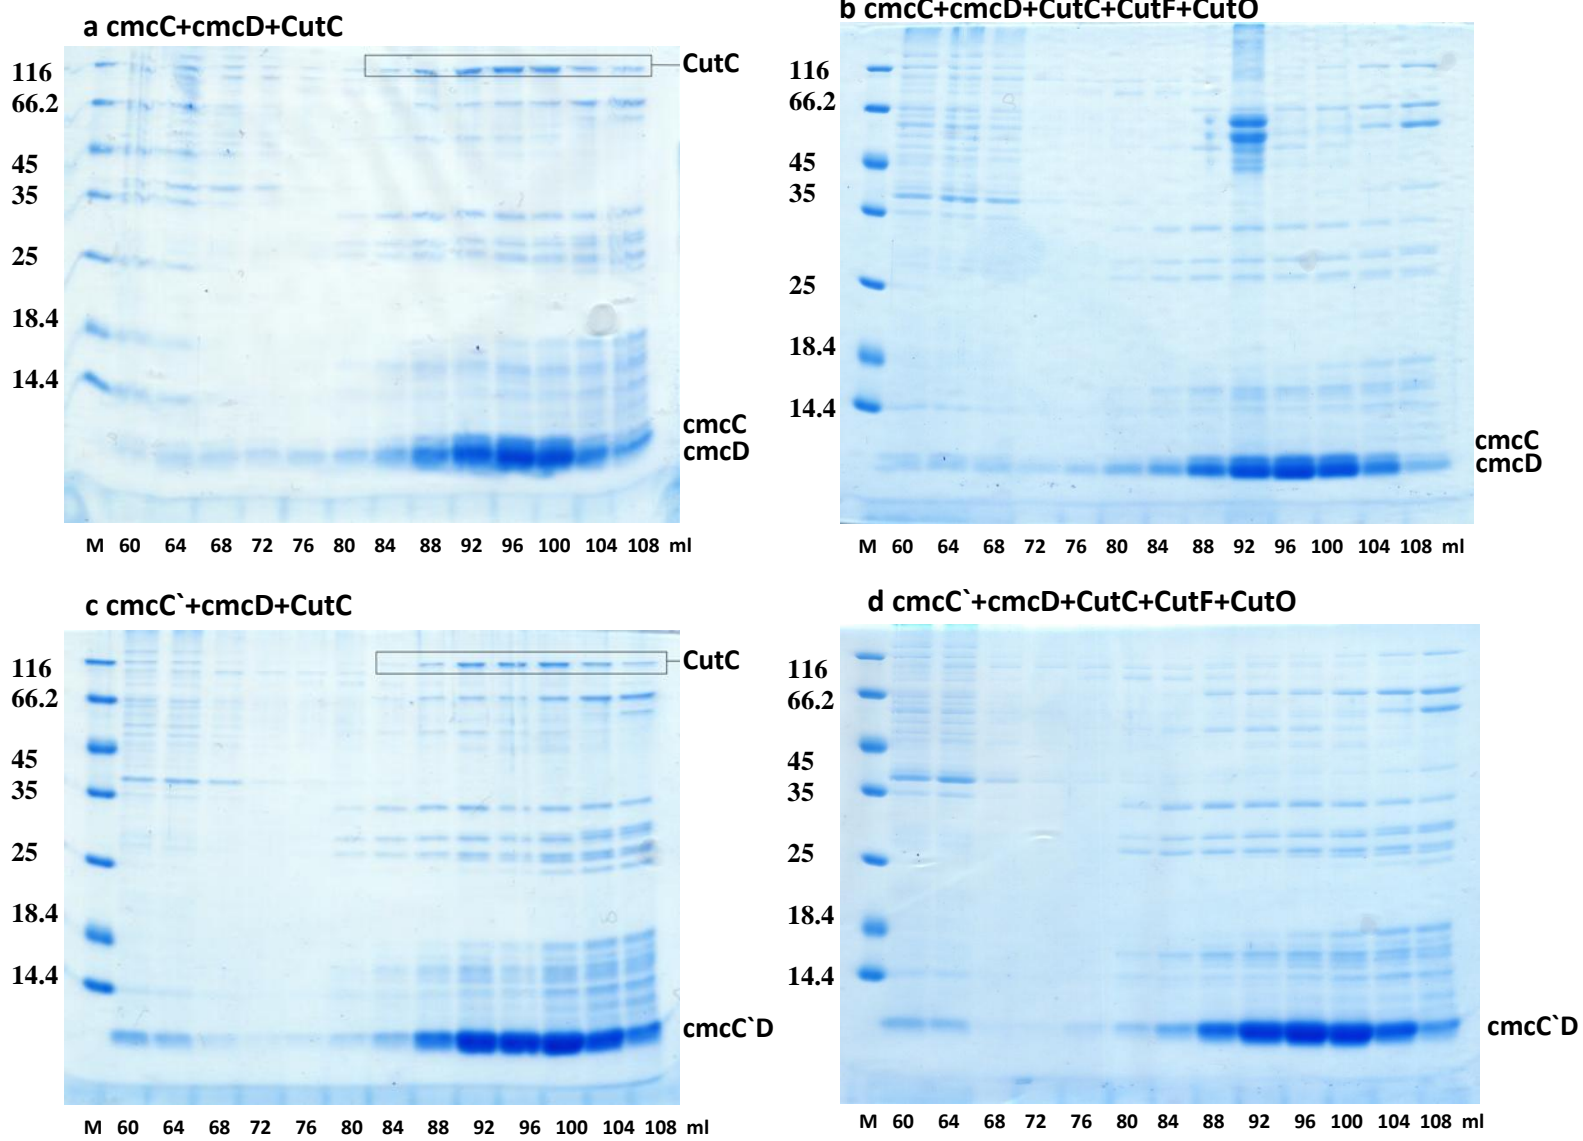

**Supplementary Figure 16 SDS-PAGE analysis of Superose 6 gel filtration chromatography processes. a,** cmcC+cmcD+CutC 60-108 ml. **b,** cmcC+cmcD+CutC+CutF+CutO 60-108 ml. **c,** cmcC`+cmcD+CutC 60-108 ml. **d,** cmcC`+cmcD+CutC+CutF+CutO 60-108 ml. M – marker, sizes are measured in kDa.



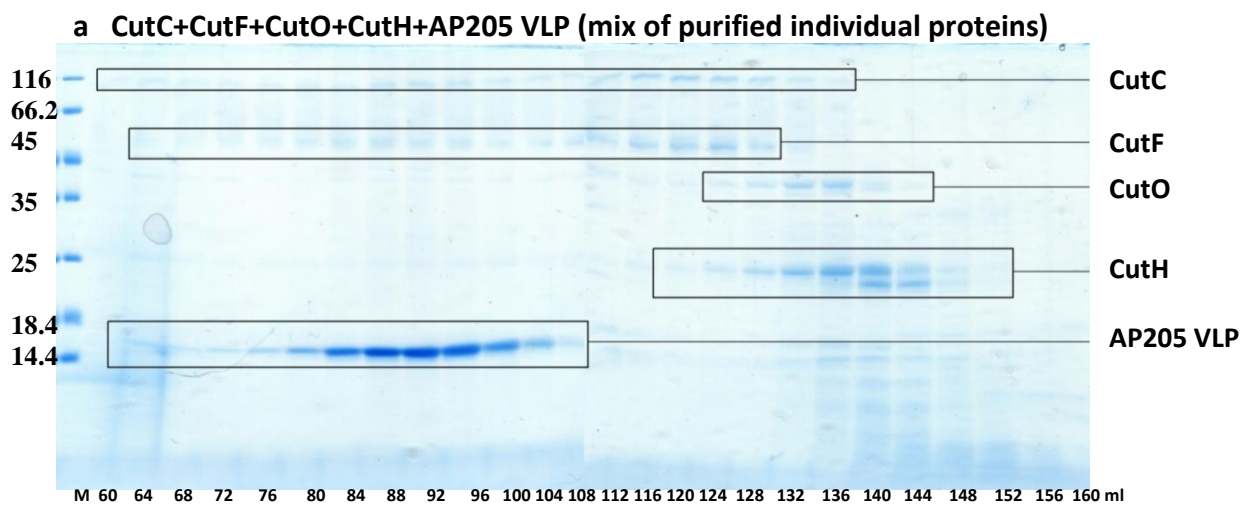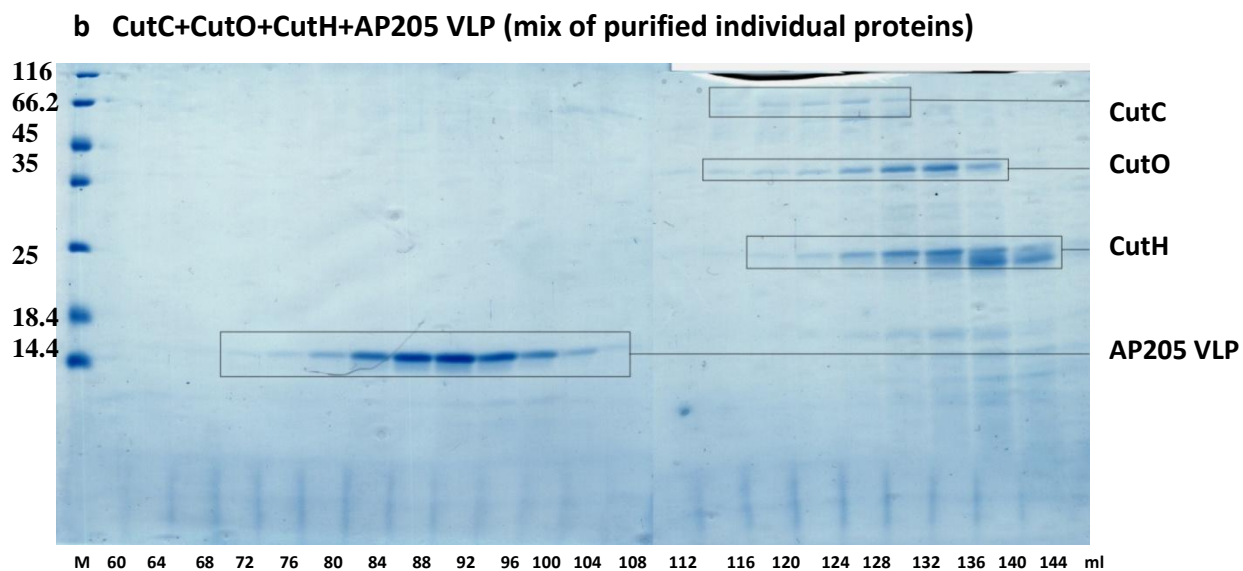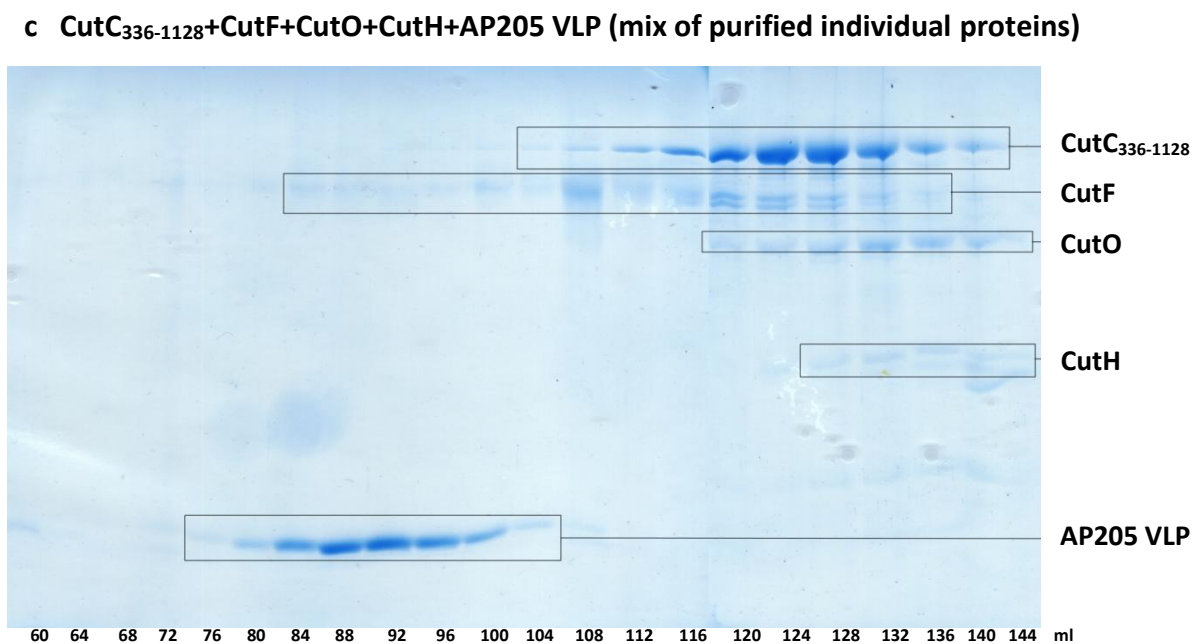

**Supplementary Figure 17 SDS-PAGE analysis of Superose 6 gel filtration chromatography processes. a,** mixture of H6x tagged, purified CutC, CutF, CutO, CutH and AP205 VLP, 60-160 ml. **b,** mixture of H6x tagged, purified CutC, CutO, CutH and AP205 VLP, 60-160 ml. **c,** mixture of H6x tagged, purified CutC<sub>336-1128</sub>, CutF, CutO, CutH and AP205 VLP, 60-160 ml. M – marker, sizes are measured in kDa.

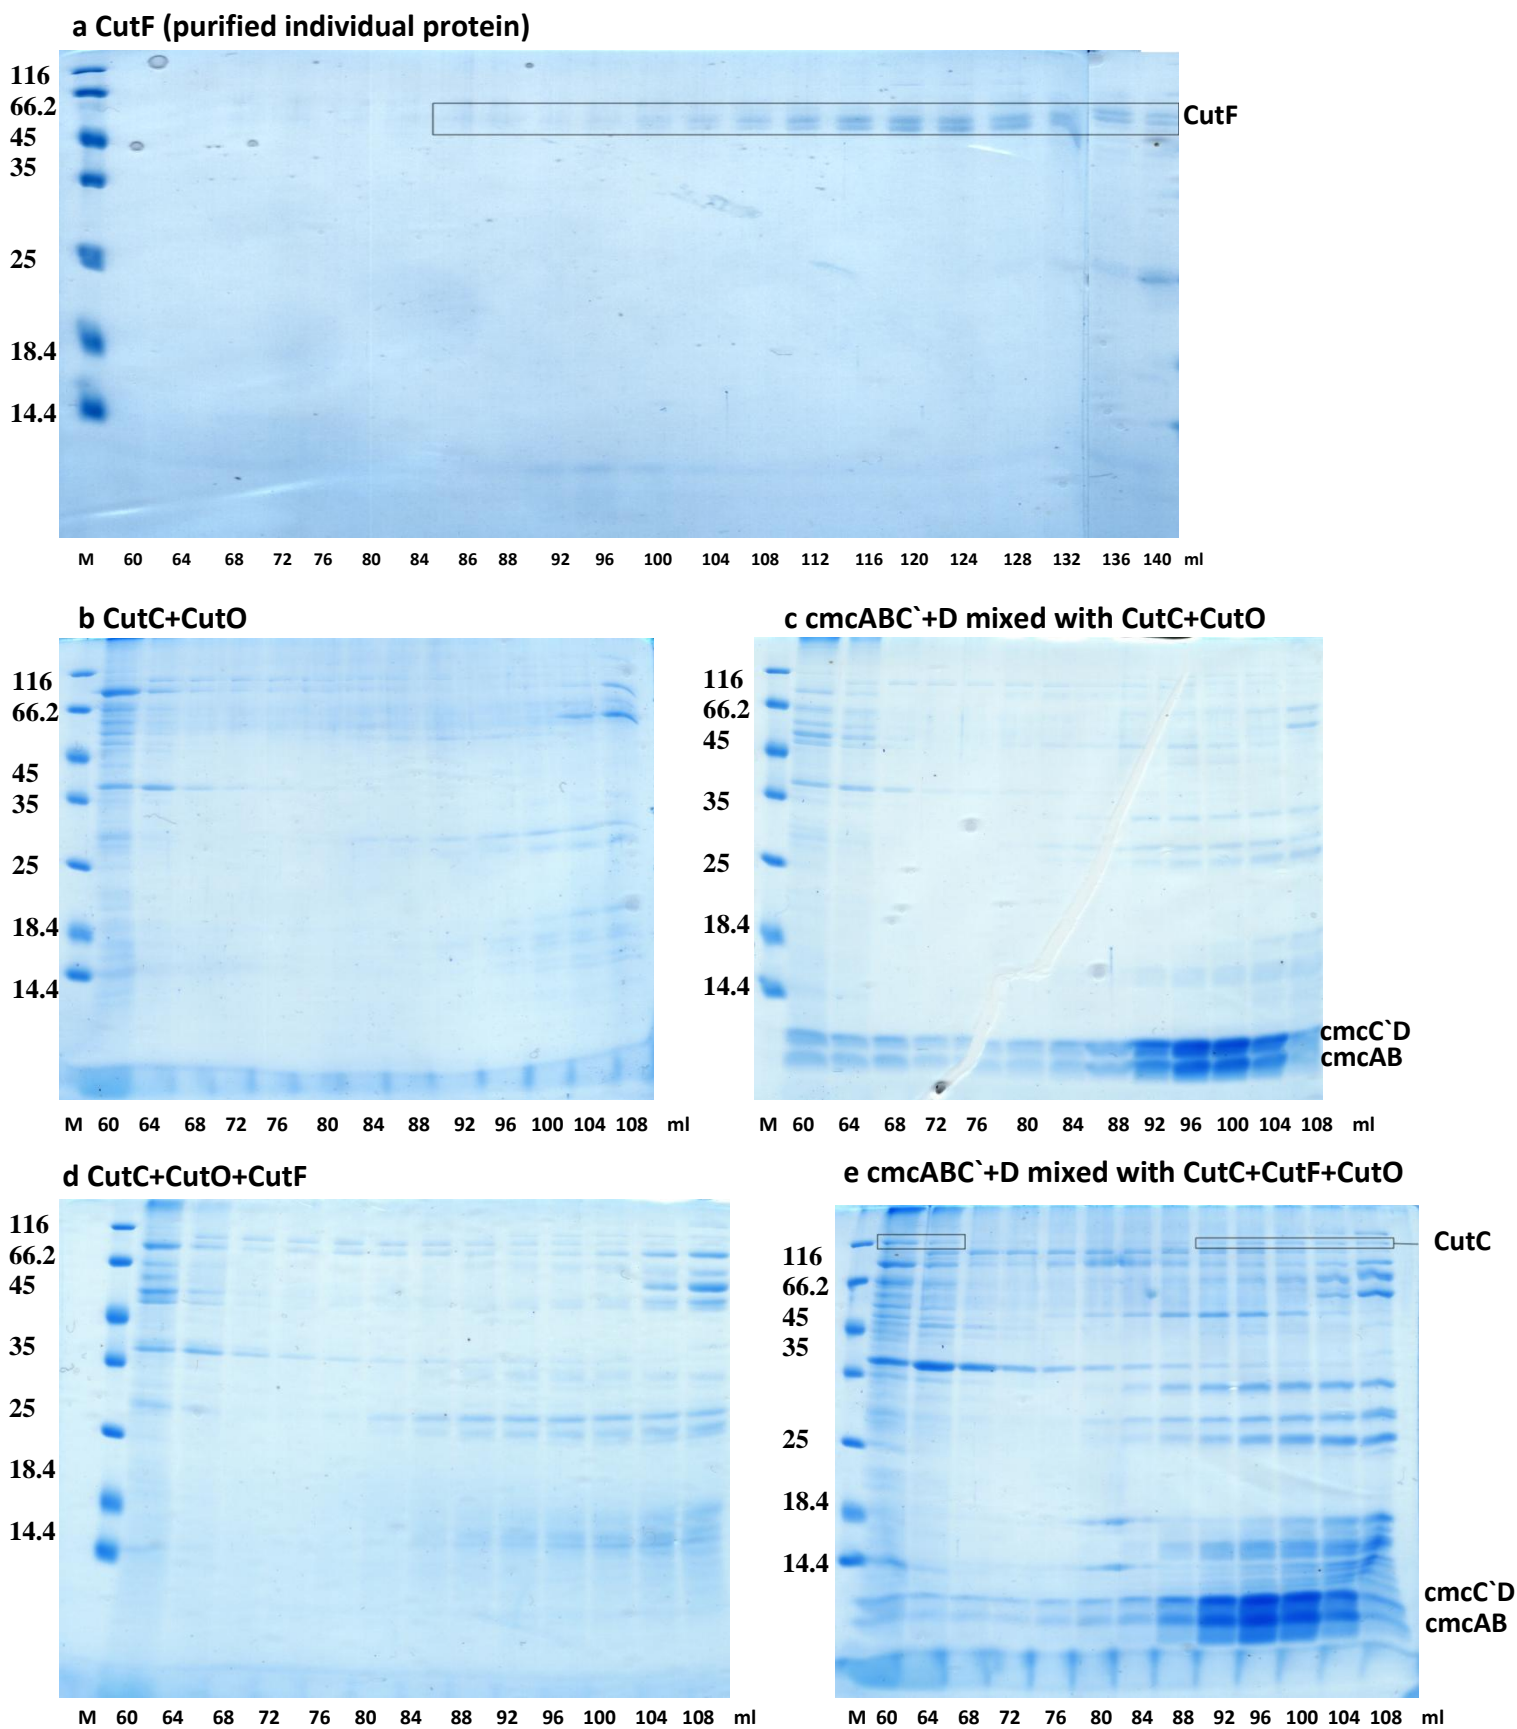

**Supplementary Figure 18 SDS-PAGE analysis of Superose 6 gel filtration chromatography processes. a,** purified H6x tagged CutH, 60-140 ml. **b,** CutC, 60-108 ml. **c,** CutC biomass mixed with cmcABC`+D biomass. **d,** CutC+CutO+CutF, 60-108 ml. **e,** CutC+CutO+CutF biomass mixed with cmcABC`+D biomass.

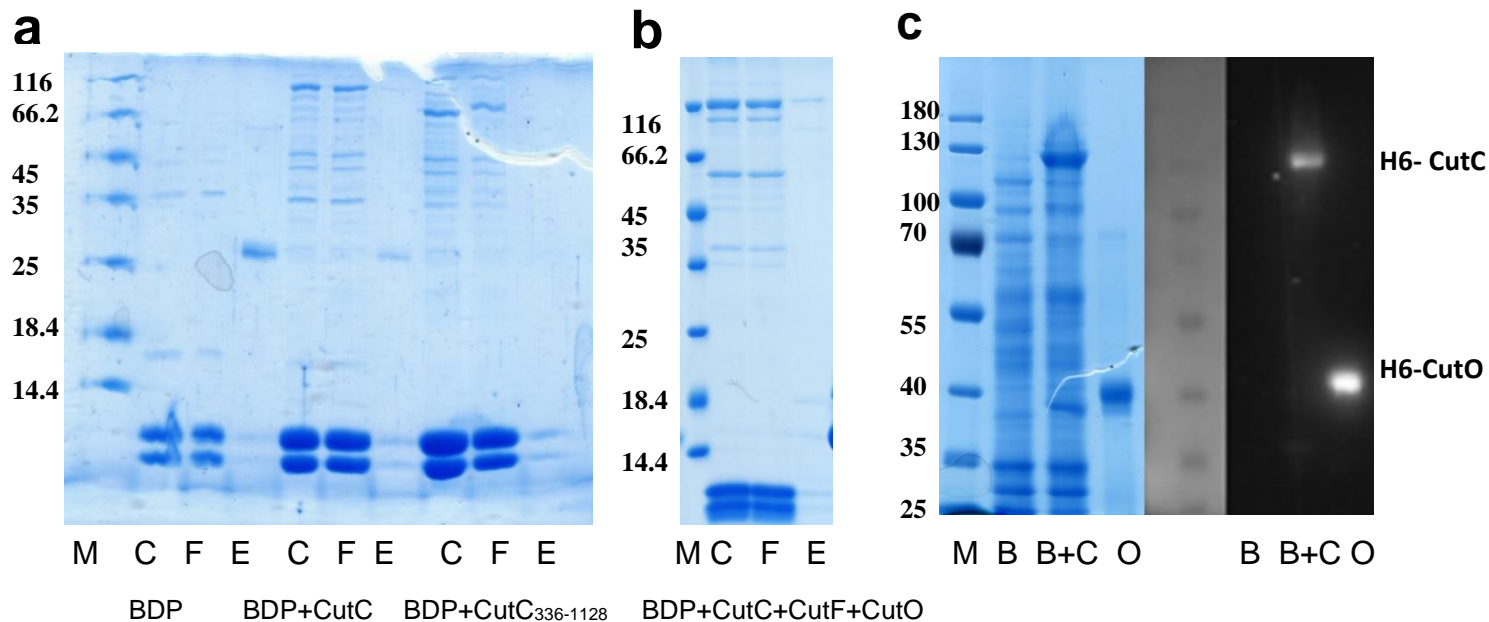

**Supplementary Figure 19 SDS-PAGE and Western blot analysis of BDP His-trap Ni<sup>2+</sup> affinity chromatography fractions. a**, control (C), flow-through (F) and elution (E) fractions obtained from analytic chromatography of small type BDPs. BDPs without encapsulated cargo (BDP), BDPs with encapsulated H6x-CutC (cmcABC+D +CutC) and BDPs with encapsulated H6-CutC<sub>336-1128</sub> (cmcABC+D+CutC<sub>336-1128</sub>). **b**, control (C), flow-through (F) and elution (E) fractions obtained from analytic chromatography of large type BDPs particles with encapsulated H6x-CutC+CutF+CutO (cmcABC+D+CutC+CutF+CutO). The analyzed protein was in the large particle Superose 6 gel filtration peak. M – marker, sizes are measured in kDa. **c**, SDS-PAGE (left) and anti-His6x tag Western blot (right) analysis of small type BDPs (B), small type BDPs with encapsulated CutC (B+C) and control his6x-tagged CutO (O). M – marker, sizes are measured in kDa.



**a** MIELDNDLQSRQNARELVRNAKKAQAMLATFSQQQIDAIVK**NVAQEAAHHAELAK**MAAEETGFGNWQDK  
 VLKNRFASLR**VYDAIK**DMKTVGIIHDDPVKKVMDVGVPLGVICALVPSTNPTSTVIYKALIALKAGNAII  
 FSPHPGARQCSWKAIEIVKRAAEAAGAPEGCVDGITQLTLEATSELMHSDKVSLILATGGEGMVRAAYAS  
 GTPTISGGPGNGPAFIER**SADIHHAVK**DIITSKTFDNGVICASEQSIIVEGCIYDEVHRELEAQQGAYFMN  
 EDEAAKMAALLLRPNGTINPKVVGKTALYLSQMAGFCVPASTKVLIAEQTTVSPK**NPYSR**EKLCPVGLY  
 VAEDWKAACHRVVELLTNEGLGHTLVIHTRNQDVIRQFSLEKPVNRILINTPAALGGIGATTNISPALTL  
 GCGAVGGGSSSDNVGPMNLLNIRKVGYGVRSIDELRAPGSRPEPQPTIVSPASDPQRSILDDVRFNAPAN  
 AAPAR**SAGSDDR**FASAGAASMEGEINEQNVERVIRQVLERLAK

| M/z observed | M/z expected | Peptide        |
|--------------|--------------|----------------|
| 1559.8953    | 1559.7924    | NVAQEAAHHAELAK |
| 976.2629     | 977.5163     | SADIHHAVK      |
| 708.2392     | 708.3926     | VYDAIK         |
| 707.1857     | 707.2954     | SAGSDDR        |
| 636.2541     | 636.31       | NPYSR          |

**b** MSEFLLKPRICFGQDALSVLNELSAR**SVLLVTDQAMVKFGLAERTALLR**QR**GIAWQMWDDVVADPDIAT**  
**VVR**GMKLMNDNHYPDLVIALGGGSVIDAAKAVIFSLAQTRPQANRPRPCFVAIPTTSGTGSEVTAFFSVVKA  
 NAEKLVLDASLLPDIAILDPAVTSVPPAITADTGMDVLCHALEAYVSRAASDFSDALAEK**VVQQVFRY**  
**LPTCWR**SGDNLLAREKMHNASCMAFMTNASLGI THSLAHALGGVFRVPHGRANALLMAHVVAWNADVD  
 GQCDTLAAHKYAR**LAHLLDLPAASPR**QGVASLLVAIQALKEEMNMPSGISDTGIDAPEFDRRLPEMVGQA  
 LR**DSCTPTNPR**APDANALTELYRQAWHGQQTSPGGAPLARAYG

| M/z observed | M/z expected | Peptide            |
|--------------|--------------|--------------------|
| 2358.8623    | 2357.1594    | GIAWQMWDDVVADPDIAT |
| 1373.5954    | 1373.7899    | LAHLLDLPAASPR      |
| 1303.5294    | 1303.7290    | SVLLVTDQAMVK       |
| 990.6034     | 990.4309     | DSCTPTNPR          |
| 939.7214     | 938.4553     | YLPTCWR            |
| 877.1389     | 875.5097     | VVQQVFR            |
| 695.1060     | 692.3726     | FGLAER             |
| 675.3118     | 672.4403     | VTALLR             |

**Supplementary Figure 20 MALDI-TOF peptide mass fingerprinting analysis of CutF and CutO zones a, CutF (Supplementary Figure 5c). b, CutO (Supplementary Figure 5a). Identified peptides are colored in red.**

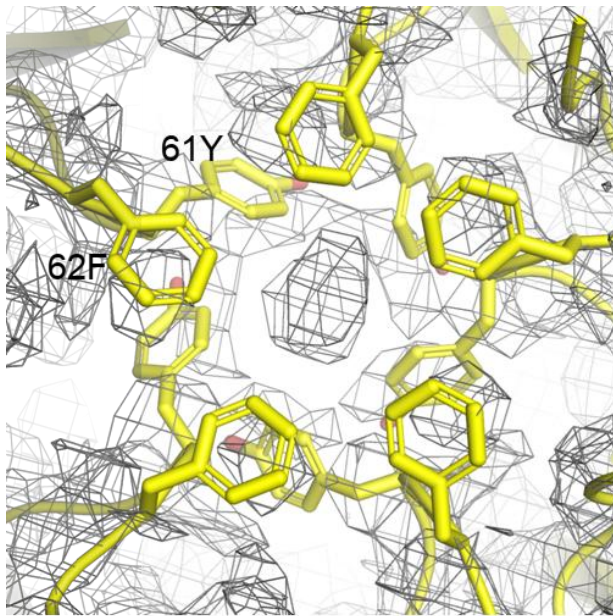

cmcD

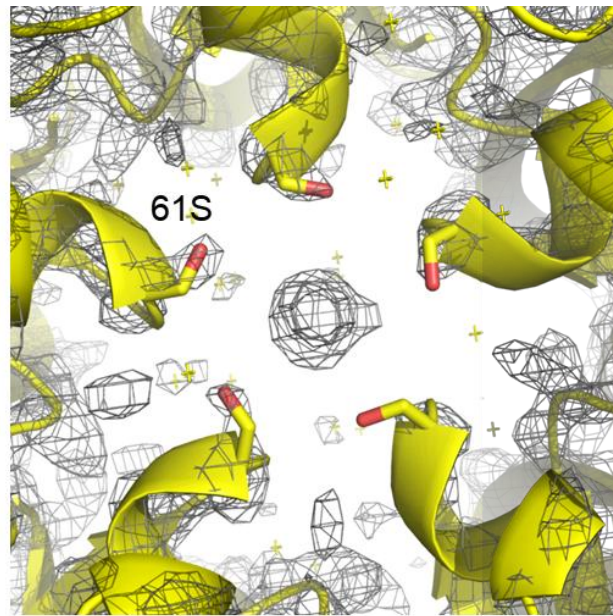

CcmL (PDB 2QW7)

**Supplementary Figure 21 Comparison of cmcD and CcmL (PDB 2QW7) pore structures.** Map for cmcD rendered at sigma 3 level, map for CcmL rendered at sigma 2 level.

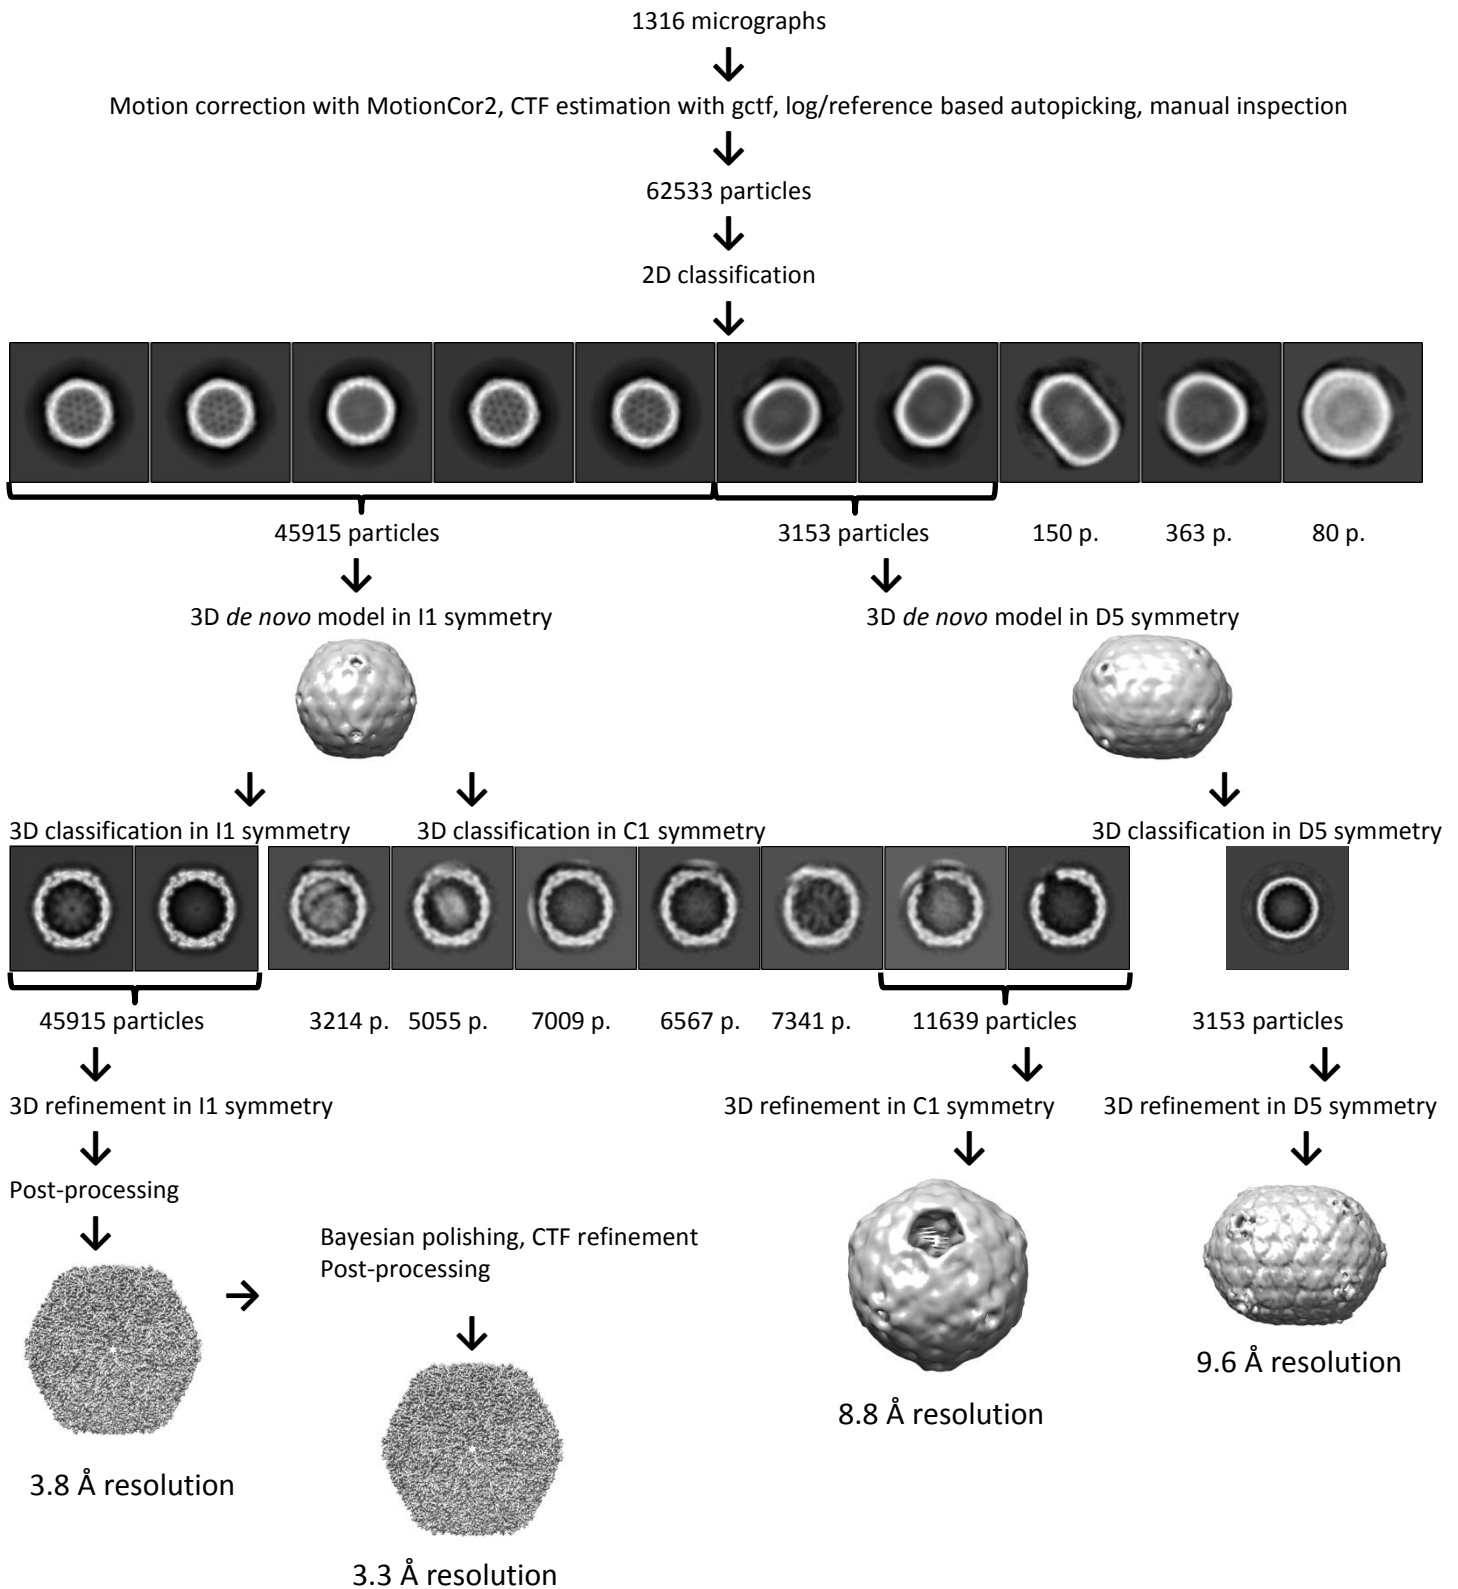

**Supplementary Figure 22 Cryo-EM analysis of *cmcABC*+*cmcD*+*CutC* BMC particles from Superose 6 gel filtration small particle peaks.** Image processing workflow is described in the Materials and Methods section.



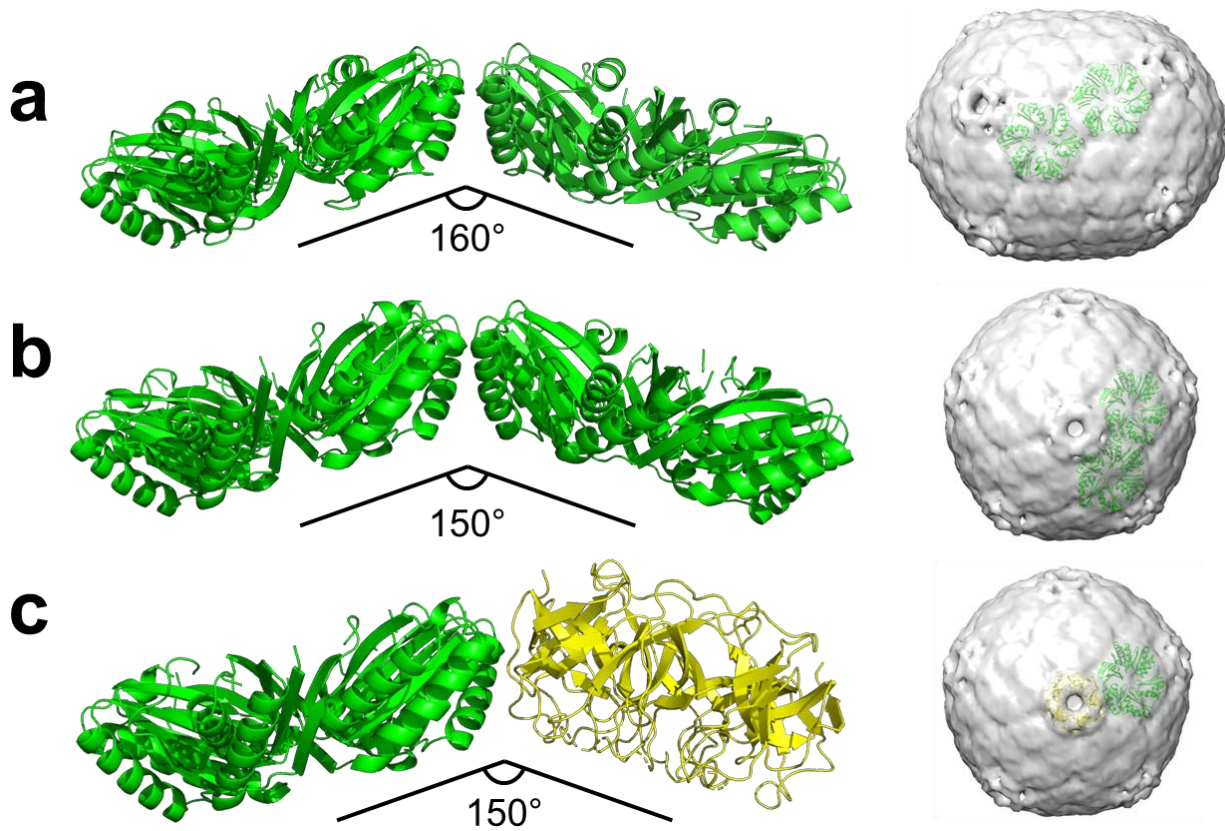

**Supplementary Figure 23 Hexamer-hexamer and pentamer-hexamer contacts formed in GRM2 BMC particles.** cmcC` hexamers are colored green, and cmcDpentamers are colored yellow. **a**, pT=4,Q=7 hexamer-hexamer contacts. Two hexameric cmcC` atomic models were fitted in a low-resolution pT=4,Q=7 map in UCSF Chimera. **b**, pT=4 hexamer-hexamer contacts. **c**, pT=4 pentamer-hexamer contacts.

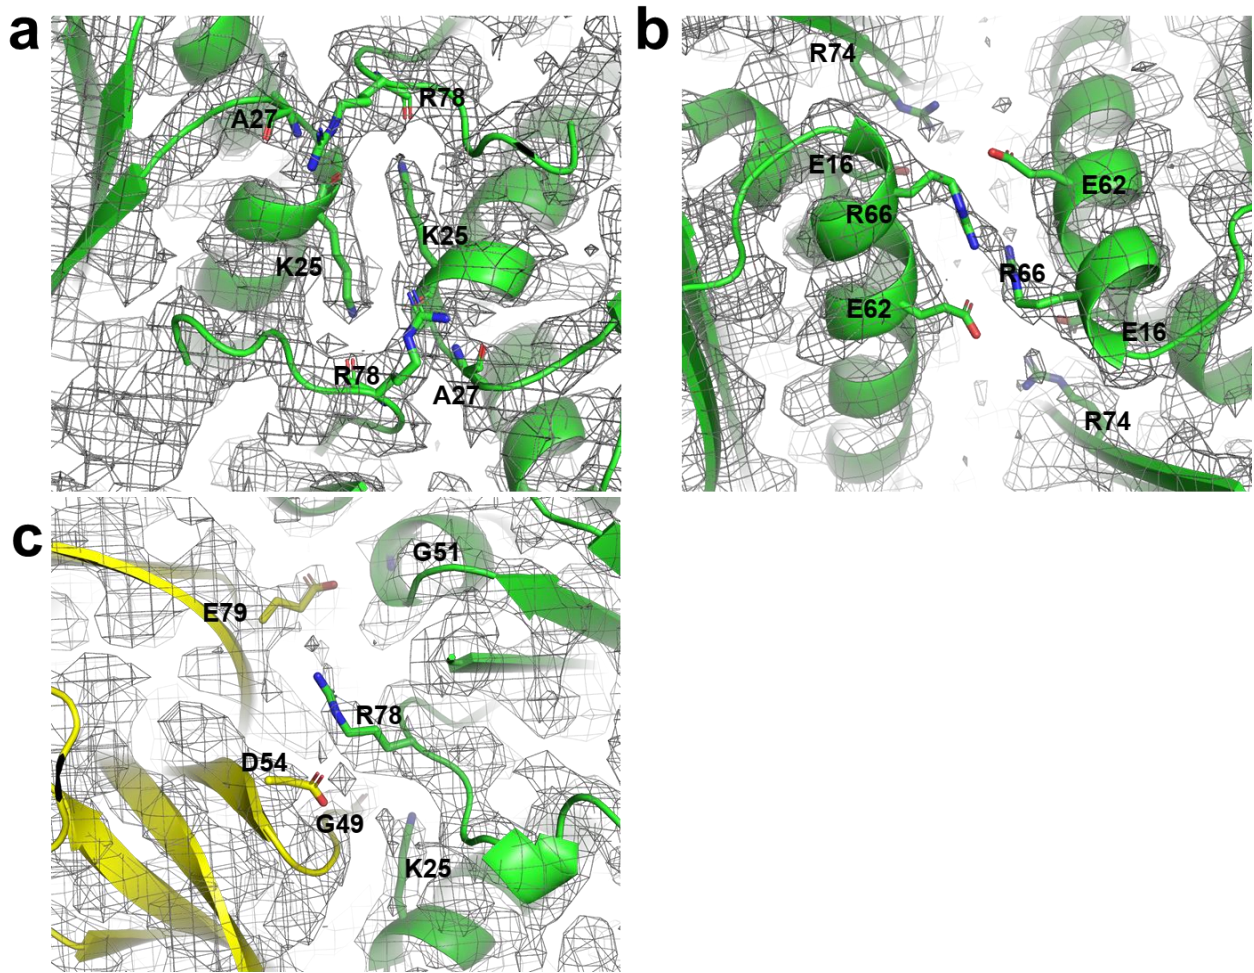

**Supplementary Figure 24 Detailed view of hexameric-hexameric (a and b) and pentameric-hexameric interfaces (c) with displayed electron density. Maps are displayed at the sigma-3 level.**

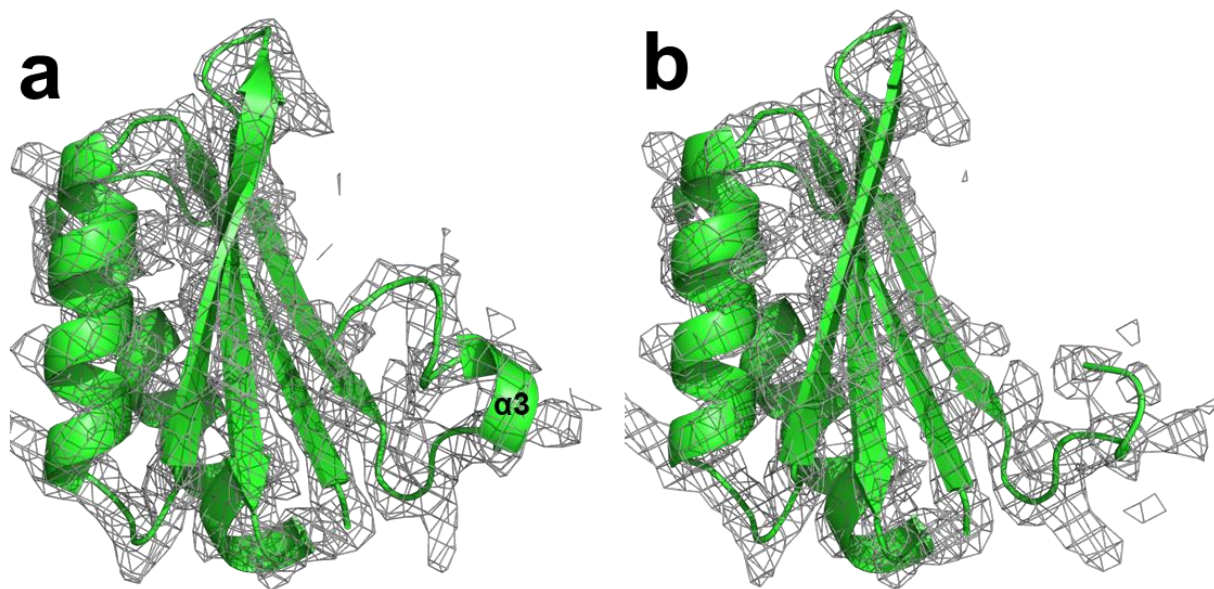

**Supplementary Figure 25 Comparison of cmcC` monomer structures involved in different contacts. a,** hexamer-pentamercontact. **b,** hexamer-hexamer contact. Cryo-EM maps are displayed at the sigma-2 level.



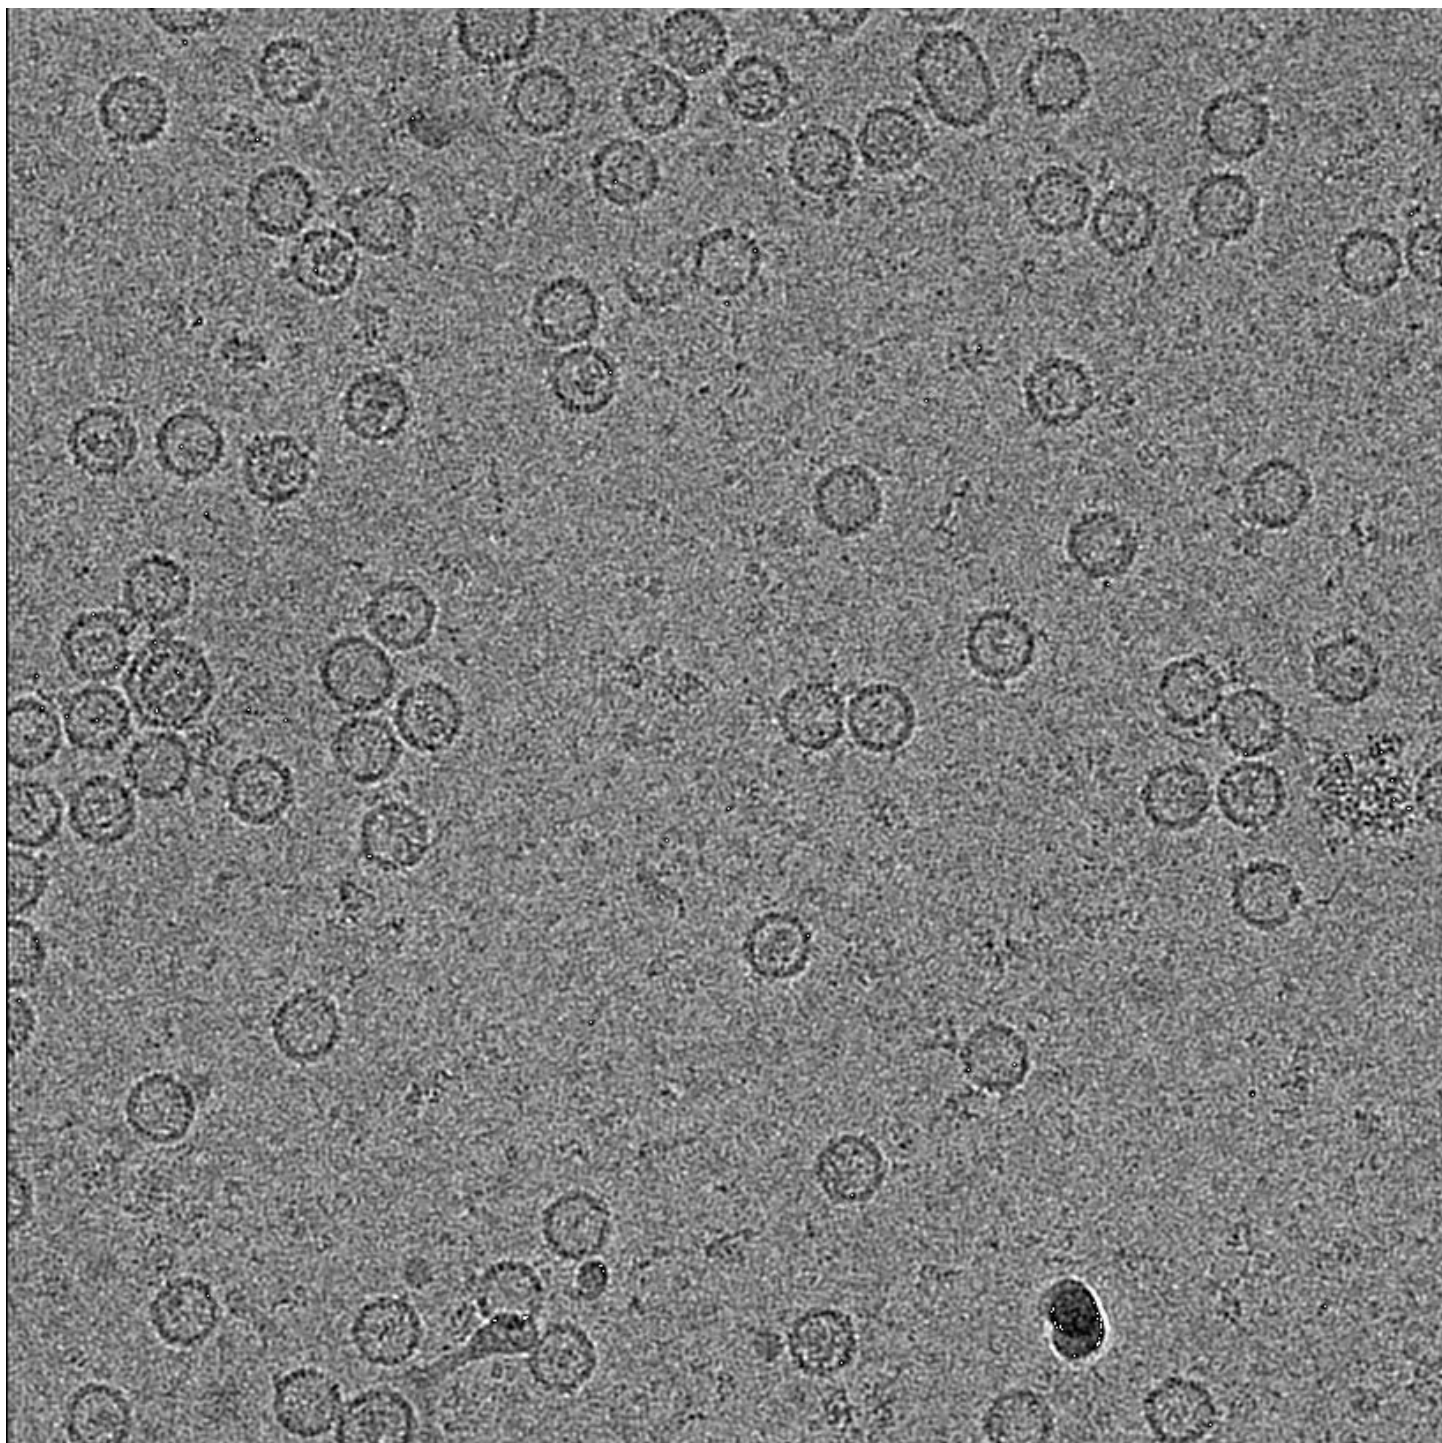

**Supplementary Figure 26 An exemplary cryo-EM micrograph of BDPs.**

**Supplementary Table 1 Primer sequences.**

|                                                                       |                                              |
|-----------------------------------------------------------------------|----------------------------------------------|
| CutC (PacI/NcoI+HindIII), T7-1                                        | Fw ATATTCATGACGGCACACTACAACCTAACGCCGC        |
|                                                                       | Rv AATTAAGCTTTTAGAACTTCTCAATCACCGTACGGC      |
| CutF (NcoI+HindIII), T7-1                                             | Fw ATATCCATGGTTGAACTGGATAACGATTTGCAGTCC      |
|                                                                       | Rv ATATAAGCTTTACTTAGCAAGGCGCTCCAGC           |
| CutF (NdeI+XhoI), T7-2                                                | Fw ATATCATATGATTGAACTGGATAACGATTTGCAGTCC     |
|                                                                       | Rv ATATCTCGAGTTACTTAGCAAGGCGCTCCAGC          |
| CutO (BglII/BamHI+HindIII), T7-1                                      | Fw ATATAGATCTATGAGTGAATTTTTACTGAAACCGCG      |
|                                                                       | Rv ATATAAGCTTTTACCCGTAGGCCCGCGC              |
| CutO (NdeI+XhoI), T7-2                                                | Fw ATATCATATGAGTGAATTTTTACTGAAACCGCG         |
|                                                                       | Rv ATATCTCGAGTTACCCGTAGGCCCGCGC              |
| CutH (NcoI+HindIII), T7-1                                             | FwATATCCATGGTCGACACCCTGGTTCGCG               |
|                                                                       | RvATATAAGCTTTTAGCCGATGAGCGTCACCTG            |
| CutC 336-1128 (PacI/NcoI+HindIII), T7-1                               | Fw ATATTCATGAGCGGCTTAACCCGCGTATGC            |
|                                                                       | Rv AATTAAGCTTTTAGAACTTCTCAATCACCGTACGGC      |
| CutC 1-226 (PacI/NcoI+HindIII), T7-1                                  | Fw ATATTCATGACGGCACACTACAACCTAACGCCGC        |
|                                                                       | Rv AATTAAGCTTTTAGTGGCTGACCGGCTGTACGC         |
| cmcABC (NcoI+HindIII), T7-1                                           | Fw ATATCCATGGGTGATGCATTGGGGCTTATCGAAACCAAAG  |
|                                                                       | Rv ATATAAGCTTTTATGCTTTGTGCTGCGCCGCGATTTTTTCG |
| cmcABC` (NcoI+HindIII), T7-1                                          | Fw ATATCCATGGGTGATGCATTGGGGCTTATCGAAACCAAAG  |
|                                                                       | Fw ATATAAGCTTTTATGCTTTGTGCTGCGCCGCGATTTTTTCG |
| cmcD (NdeI+XhoI), T7-2                                                | Fw ATATCCATGGTGCTCGCAAAGGTAACCGGCC           |
|                                                                       | Rv ATATAAGCTTTTACTCCTGTTCCGGTGTCCCGAAAC      |
| cmcE (NcoI+HindIII), T7-1                                             | Fw ATATCCATGGCCAAAAGTTTAGGCGTAATTGAAACGC     |
|                                                                       | Rv ATATAAGCTTTTATGACTTCTCCCTTTCTCAGCGCCGG    |
| cmcA (NcoI+HindIII), T7-1                                             | Fw ATATCCATGGGTGATGCATTGGGGC                 |
|                                                                       | Rv ATATAAGCTTTTAGGCCTTGTGTTAATGACGATTTTG     |
| cmcC (NcoI+HindIII), T7-1                                             | Fw ATATCCATGGCCAAAGAAGCGCTTGGTCTTATCGAAAC    |
|                                                                       | Rv ATATAAGCTTTTATGCTTTGTGCTGCGCCGCGATTTTTTCG |
| cmcC` (NcoI+HindIII), T7-1                                            | Fw ATATCCATGGCCAAAGAAGCGCTTGGTCTTATCGAAAC    |
|                                                                       | Rv ATATAAGCTTTTAAGCATTATGCGGCCGCAAACTTTTATG  |
| cmcCtrunc (NcoI+HindIII), T7-1                                        | Fw ATATCCATGGCCAAAGAAGCGCTTGGTCTTATCGAAAC    |
|                                                                       | Rv ATATAAGCTTTTAGATTTTTTCGATGTCGTTATGTGGAC   |
| whole prsf-CutO-Duet1 region for insertion in prsf-CutC-CutFXhoI site | Fw TATACTCGAGGATCGATCTCGATCCCGCG             |
|                                                                       | Rv ATATCTCGAGTTACCCGTAGGCCCGCGC              |

GenBank™ accession number ARRZ01000032.1 entry<sup>2</sup> was used for primer design.

**Supplementary Table 2 Cryo-EM data collection, refinement and validation statistics.**

|                                                     | pT=4 BMC derived particles | pT=4 BMC derived particles with one missing penameric unit | pT=4,Q=7 BMC particles |
|-----------------------------------------------------|----------------------------|------------------------------------------------------------|------------------------|
|                                                     | EMDB EMD-4595              | EMDB EMD-4597                                              | EMDB EMD-4596          |
|                                                     | PDB 6QN1                   |                                                            |                        |
| <b>Data collection and processing</b>               |                            |                                                            |                        |
| Magnification                                       | 120000                     | 120000                                                     | 120000                 |
| Voltage (kV)                                        | 200                        | 200                                                        | 200                    |
| Electron exposure (e <sup>-</sup> /Å <sup>2</sup> ) | 60                         | 60                                                         | 60                     |
| Defocus range (µm)                                  | -1.4 to -3                 | -1.4 to -3                                                 | -1.4 to -3             |
| Pixel size (Å)                                      | 1.23                       | 1.23                                                       | 1.23                   |
| Symmetry imposed                                    | I                          | C1                                                         | D5                     |
| Initial particle images (no.)                       | 62533                      | 62533                                                      | 62533                  |
| Final particle images (no.)                         | 45915                      | 11639                                                      | 3153                   |
| Map resolution (Å)                                  | 3.3                        | 8.75                                                       | 9.64                   |
| FSC threshold                                       | 0.143                      | 0.143                                                      | 0.143                  |
| Map resolution range (Å)                            | 3.3-35                     | 8.75-35                                                    | 9.64-35                |
| <b>Refinement</b>                                   |                            |                                                            |                        |
| Initial model used (PDB code)                       | 4QIV and 4N8X              |                                                            |                        |
| Model resolution (Å)                                | 3.3                        |                                                            |                        |
| FSC threshold                                       | 0.143                      |                                                            |                        |
| Map sharpening <i>B</i> factor (Å <sup>2</sup> )    | -150                       |                                                            |                        |
| Model composition                                   |                            |                                                            |                        |
| Non-hydrogen atoms                                  | 141480                     |                                                            |                        |
| Protein residues                                    | 19740                      |                                                            |                        |
| Ligands                                             |                            |                                                            |                        |
| B factors (Å <sup>2</sup> )                         |                            |                                                            |                        |
| Protein                                             | 30                         |                                                            |                        |
| Ligand                                              |                            |                                                            |                        |
| R.m.s. deviations                                   |                            |                                                            |                        |
| Bond lengths (Å)                                    | 0.007                      |                                                            |                        |
| Bond angles (°)                                     | 0.62                       |                                                            |                        |
| Validation                                          |                            |                                                            |                        |
| MolProbity score                                    | 1.56                       |                                                            |                        |
| Clashscore                                          | 4.44                       |                                                            |                        |
| Poor rotamers (%)                                   | 0.4                        |                                                            |                        |
| Ramachandran plot                                   |                            |                                                            |                        |
| Favored (%)                                         | 95.1                       |                                                            |                        |
| Allowed (%)                                         | 4.9                        |                                                            |                        |
| Disallowed (%)                                      | 0                          |                                                            |                        |



## Supplementary references

1. Axen, S. D., Erbilgin, O., Kerfeld, C. A. A taxonomy of bacterial microcompartment loci constructed by a novel scoring method. *PLOS Comput. Biol.* 10, e1003898 (2014).
2. Wright M.S., Perez F., Brinkac L., Jacobs M.R., Kaye K., Cober E., van Duin D., Marshall S.H., Hujer A.M., Rudin S.D., Hujer K.M., Bonomo R.A., Adams M.D. Population structure of KPC-producing *Klebsiella pneumoniae* isolates from midwestern U.S. hospitals. *Antimicrob Agents Chemother* 58, 4961-5 (2014).
